# Supplementary material for: Photophysical investigation into room-temperature emission from xanthene derivatives
Source: Royal Society of Chemistry journal article supplement (doi:10.1039/d3cp02802j), 2023-01-01
Supplement: d3cp02802j1.pdf [file d3cp02802j1.pdf]

## SUPPORTING INFORMATION

### Photophysical investigation into room-temperature emission from xanthene derivatives

Kristen Harrington<sup>a</sup> David T. Hogan,<sup>b</sup> Todd C. Sutherland<sup>b\*</sup> and Kevin Stamplecoskie<sup>a\*</sup>

Table of Contents:

|                                                                                                                                                                  |    |
|------------------------------------------------------------------------------------------------------------------------------------------------------------------|----|
| Xanthene (1) synthesis .....                                                                                                                                     | 3  |
| Thioxanthene (2) synthesis.....                                                                                                                                  | 4  |
| Thioxanthene Sulfoxide (3) synthesis .....                                                                                                                       | 4  |
| Thioxanthene Sulfone (4) synthesis.....                                                                                                                          | 5  |
| <sup>1</sup> H NMR (400 MHz, CDCl <sub>3</sub> , 298 K) for thioxanthene sulfoxide .....                                                                         | 6  |
| DEPT-Q <sup>13</sup> C{ <sup>1</sup> H} NMR (100 MHz, CDCl <sub>3</sub> , 298 K) for thioxanthene sulfoxide.....                                                 | 6  |
| High-resolution mass spectrum (EI+) for thioxanthene sulfoxide.....                                                                                              | 7  |
| Elemental analysis for recrystallized xanthene .....                                                                                                             | 7  |
| Elemental analysis for recrystallized thioxanthene.....                                                                                                          | 7  |
| Elemental analysis for recrystallized thioxanthene sulfoxide .....                                                                                               | 7  |
| Elemental analysis for recrystallized thioxanthene sulfone .....                                                                                                 | 8  |
| Gas Chromatograms of 1 -4.....                                                                                                                                   | 8  |
| Crystallographic Packing diagrams of 1 - 4.....                                                                                                                  | 9  |
| Solution (10 <sup>-5</sup> M, ACN) absorbance, emission, and excitation spectra. ....                                                                            | 11 |
| Solution (5-50 mM, ACN) absorbance spectra. ....                                                                                                                 | 12 |
| Emission and Excitation spectra of 1 – 4 (50 mM, ACN) .....                                                                                                      | 14 |
| Solution (50 mM, ACN) variable temperature absorbance spectra of 1 - 4.....                                                                                      | 15 |
| Emission lifetimes of solutions (50 mM, ACN) of 1 – 4. ....                                                                                                      | 15 |
| DFT calculated excited-state structure changes for 1 – 4. ....                                                                                                   | 16 |
| Computationally determined relevant S <sub>n</sub> and T <sub>n</sub> energies, and selected SOC constants for 1 – 4 in optimised S <sub>1</sub> geometries..... | 17 |
| Computationally determined S <sub>n</sub> and T <sub>n</sub> energies (eV) at optimised S <sub>1</sub> geometries for 1 - 4.....                                 | 17 |
| Computationally determined SOC constants (cm <sup>-1</sup> ) for singlet and triplet states in optimised S <sub>1</sub> geometries for 1 – 4.....                | 18 |
| Computationally determined S <sub>n</sub> and T <sub>n</sub> energies (eV) at optimised S <sub>0</sub> geometries for 1 - 4.....                                 | 19 |

## SUPPORTING INFORMATION

|                                                                                                                                           |    |
|-------------------------------------------------------------------------------------------------------------------------------------------|----|
| Computationally determined SOC constants ( $\text{cm}^{-1}$ ) for singlet and triplet states in optimised $S_0$ geometries for 1 – 4..... | 19 |
| Excitation and emission spectra of crystalline samples of 1 – 4 (200 $\mu\text{s}$ delay).....                                            | 20 |
| Variable Temperature Emission of Crystalline Samples of 1 – 4 (200 $\mu\text{s}$ delay). ....                                             | 21 |
| Emission lifetimes of crystalline solids 1 – 4 (200 $\mu\text{s}$ delay).....                                                             | 22 |
| Emission of Crystalline Samples under either air or $\text{N}_2$ atmosphere (200 $\mu\text{s}$ delay).....                                | 23 |
| Steady-state fluorescence of crystalline samples of 1, 2, and 4.....                                                                      | 23 |
| Emission lifetimes of crystalline solids 1 – 4 (prompt). ....                                                                             | 24 |
| Irradiance power (transmittance) versus emission intensity of crystalline solids 1 – 4.....                                               | 25 |
| Natural Transition orbitals (NTOs) of 1 - 4.....                                                                                          | 26 |
| DFT Computations Orca 5.0.3, PBE0 D4 def2-TZVP – Ground states ( $S_0$ ) of 1 – 4.....                                                    | 26 |
| DFT Computations Orca 5.0.3, PBE0 D4 def2-TZVP – $S_1$ of 1 – 4.....                                                                      | 28 |
| DFT Computations Orca 5.0.3, UHF def2-SVP – $T_1$ of 1 – 4. ....                                                                          | 30 |
| References. ....                                                                                                                          | 32 |

## Xanthene (1) synthesis

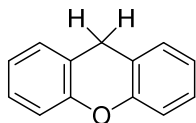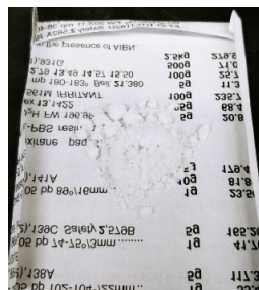

This experimental was adapted from a literature procedure.<sup>1</sup> An oven-dried 100 mL RBF with an oven-dried magnetic stirbar was cooled to room temperature under a stream of N<sub>2</sub>. Xanthone (2.0300 g, 1.0355×10<sup>-2</sup> mol, 1.0 eq) and THF (60 mL) were added to the flask, it was stoppered with a rubber septum and the headspace was flushed with N<sub>2</sub>. BH<sub>3</sub>·SMe<sub>2</sub> (2 M in THF, 7.8 mL, 1.56×10<sup>-2</sup> mol, 1.5 eq) was added in one portion by syringe and the flask neck was equipped with a pre N<sub>2</sub>-flushed water condenser. The flask was put into a 75–80 °C oil bath, stirred and refluxed for 1 hour under N<sub>2</sub>, acquiring fluffy white precipitate as time passed. The mixture was allowed to cool to room temperature, then further to 0 °C in an ice-water bath. Slowly with manual swirling excess borane was quenched with brine (9 mL, added 1 mL at a time) and 1 M HCl (12 mL, added 1 mL at a time). Swirling was continued until the solution was no longer effervescent, then it was diluted with EtOAc (12 mL) and water (12 mL) and the layers were shaken then separated in a separatory funnel. The aqueous layer was extracted with EtOAc (3×12 mL), all combined organics were washed with brine, dried over anhydrous Na<sub>2</sub>SO<sub>4</sub> and concentrated under reduced pressures into a white solid. This was dissolved in CH<sub>2</sub>Cl<sub>2</sub> and adsorbed to silica, loaded onto a 3 cm wide × 5 cm tall silica column packed in hexanes. This solvent (~350 mL) was used to first elute remaining SMe<sub>2</sub>, then all following eluate that contained shortwave UV-active fractions (visualized on TLC plates) was collected and concentrated under reduced pressures to yield xanthene (1.6630 g, 88%) as white hairy microcrystals: spectroscopic characterization was in accord with existing literature data;<sup>2</sup> m.p. (methanol) 102–103 °C (lit.<sup>3</sup> 100.5 °C from ethanol; *Anal. Calcd.* for C<sub>13</sub>H<sub>10</sub>O: C 85.69, H 5.53, Found C 85.38, H 5.61. For analysis, the solid was recrystallized from minimal boiling methanol. Colourless square plates were collected after allowing the supernatant solution to come to room temperature and sit un-agitated for 2–3 hours, then by chilling in an ice-water bath for 4–6 hours.

## SUPPORTING INFORMATION

## Thioxanthene (2) synthesis

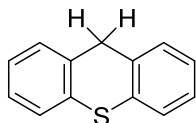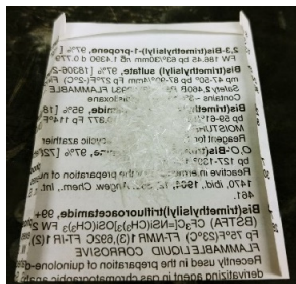

This experimental was adapted from a literature procedure.<sup>1</sup> An oven-dried 100 mL RBF with an oven-dried magnetic stirbar was cooled to room temperature under a stream of N<sub>2</sub>. Thioxanthone (2.0412 g, 9.6269×10<sup>-3</sup> mol, 1.0 eq) and THF (60 mL) were added to the flask, it was stoppered with a rubber septum and the headspace was flushed with N<sub>2</sub>. BH<sub>3</sub>·SMe<sub>2</sub> (2 M in THF, 7.0 mL, 1.4×10<sup>-2</sup> mol, 1.5 eq) was added in one portion by syringe and the flask neck was equipped with a pre N<sub>2</sub>-flushed water condenser. The flask was put into a 75–80 °C oil bath, stirred and refluxed for 1 hour under N<sub>2</sub>, acquiring fluffy brown precipitate as time passed. The mixture was allowed to cool to room temperature, then further to 0 °C in an ice-water bath. Slowly with manual swirling excess borane was quenched with brine (9 mL, added 1 mL at a time) and 1 M HCl (12 mL, added 1 mL at a time). Swirling was continued until the solution was no longer effervescent, then it was diluted with EtOAc (12 mL) and water (12 mL) and the layers were shaken then separated in a separatory funnel. The aqueous layer was extracted with EtOAc (3×12 mL), all combined organics were washed with brine, dried over anhydrous Na<sub>2</sub>SO<sub>4</sub> and concentrated under reduced pressures into a beige solid. This was dissolved in CH<sub>2</sub>Cl<sub>2</sub> and adsorbed to silica, loaded onto a 3 cm wide × 5 cm tall silica column packed in hexanes. This solvent (~500 mL) was used to first elute remaining SMe<sub>2</sub>, then all following eluate that contained shortwave UV-active fractions (visualized on TLC plates) was collected and concentrated under reduced pressures to yield thioxanthene (1.6651 g, 87%) as fine white microneedles: spectroscopic characterization was in accord with existing literature data;<sup>4</sup> m.p. (methanol) 130–132 °C (lit.<sup>5</sup> 130–131 °C from methanol); *Anal. Calcd.* for C<sub>13</sub>H<sub>10</sub>S: C 78.75, H 5.08, S 16.17, Found C 78.84, H 5.13, S 16.17. For analysis, the solid was recrystallized from minimal boiling methanol. Colourless long needles were collected after allowing the supernatant solution to come to room temperature and sit un-agitated for 2–3 hours, then by chilling in an ice-water bath for 4–6 hours.

## Thioxanthene Sulfoxide (3) synthesis

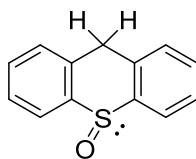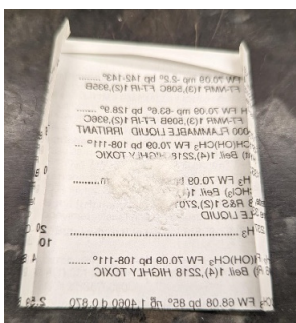

Into a 250 mL Schlenk flask were added a magnetic stirbar and thioxanthene (1.0019 g, 5.053×10<sup>-3</sup> mol, 1 eq) which was dissolved in CH<sub>2</sub>Cl<sub>2</sub> (80 mL) with stirring. The sidearm was opened and the solution was chilled in an ice-water bath. Separately, a solution of *m*-CPBA (0.4366 g, 2.530×10<sup>-3</sup> mol, 0.5 eq) in CH<sub>2</sub>Cl<sub>2</sub> (40 mL) was prepared with sonication, which was transferred with washing (2 mL CH<sub>2</sub>Cl<sub>2</sub>) into an addition funnel equipped to the flask neck. This solution was added over 20 mins to the

chilled and stirring thioxanthene solution, using  $\text{CH}_2\text{Cl}_2$  (5 mL) to wash the addition funnel of any remaining *m*-CPBA. The reaction solution was stirred for a further 3 hours at 0 °C. After this time, the mixture was allowed to warm to room temperature and it was vigorously shaken with 1M NaOH (40 mL) in a separatory funnel. The layers were separated and the aqueous layer was extracted with  $\text{CH}_2\text{Cl}_2$  (3×10 mL). The combined organics were brine washed, dried over anhydrous  $\text{Na}_2\text{SO}_4$  and concentrated under reduced pressures into a white solid. This was dissolved in  $\text{CH}_2\text{Cl}_2$ , adsorbed to silica and loaded onto a 5 cm tall × 4 cm wide silica column packed in hexanes. This solvent (~300 mL) eluted unreacted thioxanthene, which can be recovered and reused in subsequent sulfoxidations. The solvent was switched to 20% EtOAc/hexanes (~600 mL), the last ~300 mL of which contained a shortwave UV-active component on TLC plates, which was collected and concentrated to yield thioxanthene sulfoxide (0.4449 g, 38% yield, 82% brsm) as a white solid:  $^1\text{H}$  NMR (400 MHz,  $\text{CDCl}_3$ )  $\delta$  7.94 (d,  $J$  = 7.5 Hz, 2H), 7.56 – 7.37 (m, 6H), 4.20 (d,  $J$  = 16.7 Hz, 1H), 3.83 (d,  $J$  = 16.7 Hz, 1H); DEPT-Q  $^{13}\text{C}\{^1\text{H}\}$  NMR (100 MHz,  $\text{CDCl}_3$ )  $\delta$  142.0, 133.0, 130.3, 128.3, 127.6, 124.7, 35.9; HRMS (EI, positive) calculated for  $[\text{M}]^+$   $[\text{C}_{13}\text{H}_{10}\text{SO}]^+$   $m/z$  = 214.0452, found  $m/z$  = 214.0447, - 2.3 ppm difference; m.p. (methanol/ether) 118-120.5 °C (lit.<sup>6</sup> 116-118 °C from hexanes/ $\text{CH}_2\text{Cl}_2$ ); *Anal. Calcd.* for  $\text{C}_{13}\text{H}_{10}\text{SO}$ : C 72.87, H 4.70, S 14.96, Found C 73.15, H 4.74, S 15.05. For analysis, the solid was recrystallized from minimal boiling 50/50 methanol/diethyl ether. Colourless microcrystalline lumps were collected after allowing the supernatant solution to come to room temperature and sit un-agitated for 2-3 hours, then by chilling in an ice-water bath for 4-6 hours.

#### Thioxanthene Sulfone (4) synthesis

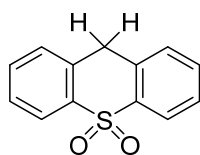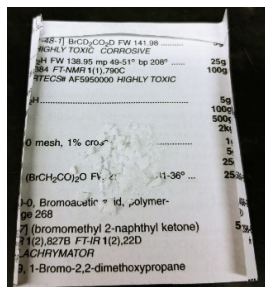

Into a 250 mL RBF were added a magnetic stirbar and thioxanthene (1.0093 g,  $5.0903 \times 10^{-3}$  mol, 1.0 eq), which was dissolved in  $\text{CH}_2\text{Cl}_2$  (15 mL), with stirring. Separately, a solution of *m*-CPBA (2.6349 g,  $1.5269 \times 10^{-2}$  mol, 3.0 eq) in  $\text{CH}_2\text{Cl}_2$  was prepared with sonication, and this was added in one portion to the stirring thioxanthene solution. After 1 hour stirring at room temperature the clear and colourless solution had become turbid with white precipitates. The mixture as diluted with  $\text{CH}_2\text{Cl}_2$  (~120 mL) to dissolve all solids, and the solution was vigorously shaken with 1 M NaOH (3×15 mL) to quench remaining acids. The aqueous layer was extracted with  $\text{CH}_2\text{Cl}_2$  (3×10 mL), all combined organics were washed with brine, dried over anhydrous  $\text{Na}_2\text{SO}_4$  and concentrated under reduced pressures to yield thioxanthene-10,10-dioxide (1.1199 g, 95%) as a white amorphous solid: spectroscopic characterization was in accord with existing literature data,<sup>7</sup> m.p. (methanol) 174-176.5 °C (lit.<sup>8</sup> 174-177.5 °C from methanol); *Anal. Calcd.* for  $\text{C}_{13}\text{H}_{10}\text{SO}_2$ : C 67.81, H 4.38, S 13.92, Found C 67.29, H 4.48, S 14.04.

## SUPPORTING INFORMATION

 $^1\text{H}$  NMR (400 MHz,  $\text{CDCl}_3$ , 298 K) for thioxanthene sulfoxide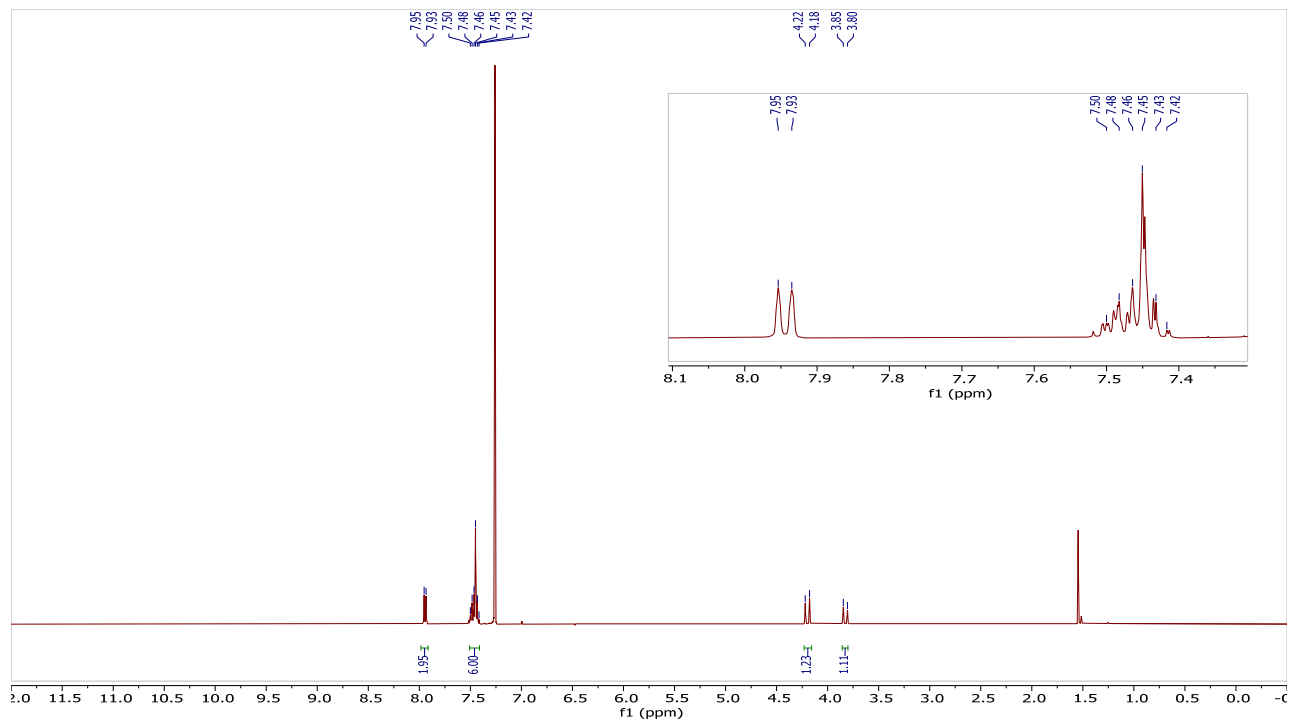DEPT-Q  $^{13}\text{C}\{^1\text{H}\}$  NMR (100 MHz,  $\text{CDCl}_3$ , 298 K) for thioxanthene sulfoxide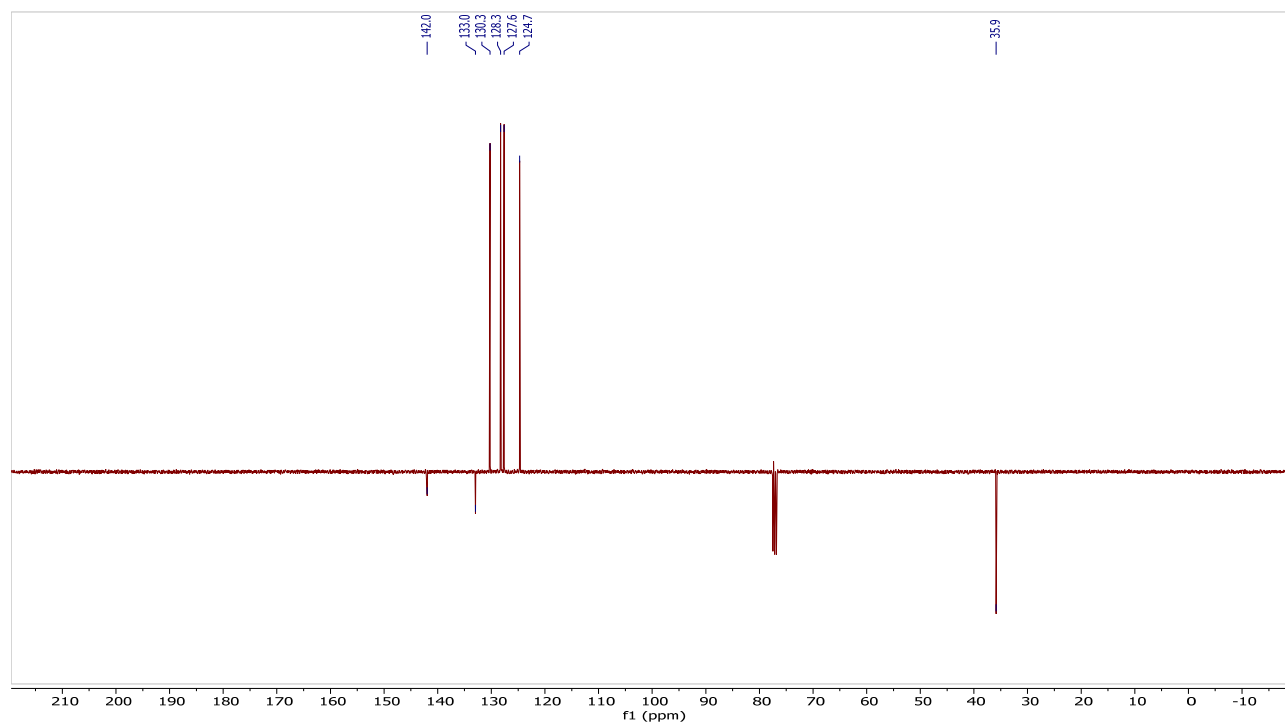

## High-resolution mass spectrum (EI+) for thioxanthene sulfoxide

## Elemental Composition Report

Page 1

## Multiple Mass Analysis: 4 mass(es) processed

Tolerance = 20.0 PPM / DBE: min = -1.5, max = 50.0

Element prediction: Off

Monoisotopic Mass, Odd and Even Electron Ions

10 formula(e) evaluated with 2 results within limits (all results (up to 1000) for each mass)

Elements Used:

C: 0-13 H: 0-10 O: 0-1 S: 0-1

Dave Hogan DTH-7-56A Dave Hogan DTH-7-56A

200724DTH1 324 (5.941) Cm (297:324-71:106)

CAB072

24-Jul-2020 09:26:37

TOF MS EI+

4.71e+004

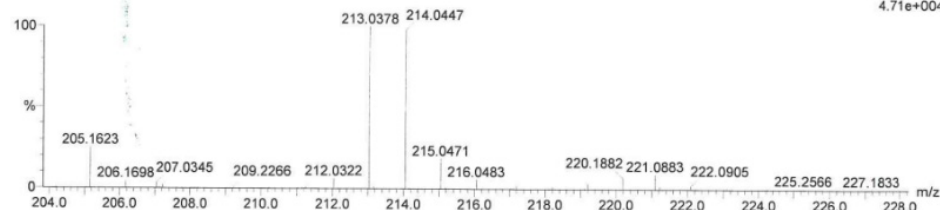

Minimum: 10.00  
Maximum: 100.00

| Mass     | RA     | Calc. Mass | mDa  | PPM  | DBE  | i-FIT   | Formula       |
|----------|--------|------------|------|------|------|---------|---------------|
| 205.1623 | 24.83  | ---        |      |      | -1.5 |         |               |
| 213.0378 | 100.00 | 213.0374   | 0.4  | 1.9  | 9.5  | 17821.6 | C13 H9 O 32S  |
| 214.0447 | 97.62  | 214.0452   | -0.5 | -2.3 | 9.0  | 132.1   | C13 H10 O 32S |
| 215.0471 | 18.35  | ---        |      |      | 50.0 |         |               |

## Elemental analysis for recrystallized xanthene

University of Calgary

Department of Chemistry EA Date: 2-1-2023

|              |       |                   |        |
|--------------|-------|-------------------|--------|
| Name:        | DAVID | Group:            | TCS    |
| Sample:      | XO-2  | Weight (mg):      | 1.347  |
| %C (Actual): | 85.38 | %C (Theoretical): | 85.69% |
| %H (Actual): | 5.61  | %H (Theoretical): | 5.53%  |
| %N (Actual): | 0.00  | %N (Theoretical): |        |
| %S (Actual): | 0.00  | %S (Theoretical): |        |

## Elemental analysis for recrystallized thioxanthene

University of Calgary

Department of Chemistry EA Date: 2-1-2023

|              |       |                   |        |
|--------------|-------|-------------------|--------|
| Name:        | DAVID | Group:            | TCS    |
| Sample:      | XS-1  | Weight (mg):      | 1.566  |
| %C (Actual): | 78.84 | %C (Theoretical): | 78.75% |
| %H (Actual): | 5.13  | %H (Theoretical): | 5.06%  |
| %N (Actual): | 0.00  | %N (Theoretical): |        |
| %S (Actual): | 16.17 | %S (Theoretical): | 16.17% |

## Elemental analysis for recrystallized thioxanthene sulfoxide

## SUPPORTING INFORMATION

University of Calgary  
Department of Chemistry EA Date: 2-1-2023

|              |       |                   |        |
|--------------|-------|-------------------|--------|
| Name:        | DAVID | Group:            | TCS    |
| Sample:      | XSO-2 | Weight (mg):      | 1.911  |
| %C (Actual): | 73.15 | %C (Theoretical): | 72.81% |
| %H (Actual): | 4.74  | %H (Theoretical): | 4.70%  |
| %N (Actual): | 0.00  | %N (Theoretical): |        |
| %S (Actual): | 15.05 | %S (Theoretical): | 14.96% |

## Elemental analysis for recrystallized thioxanthene sulfone

University of Calgary  
Department of Chemistry EA Date: 2-1-2023

|              |        |                   |        |
|--------------|--------|-------------------|--------|
| Name:        | DAVID  | Group:            | TCS    |
| Sample:      | XSO2-2 | Weight (mg):      | 2.708  |
| %C (Actual): | 67.29  | %C (Theoretical): | 67.81% |
| %H (Actual): | 4.48   | %H (Theoretical): | 4.38%  |
| %N (Actual): | 0.00   | %N (Theoretical): |        |
| %S (Actual): | 14.04  | %S (Theoretical): | 13.92% |

## Gas Chromatograms of 1 -4.

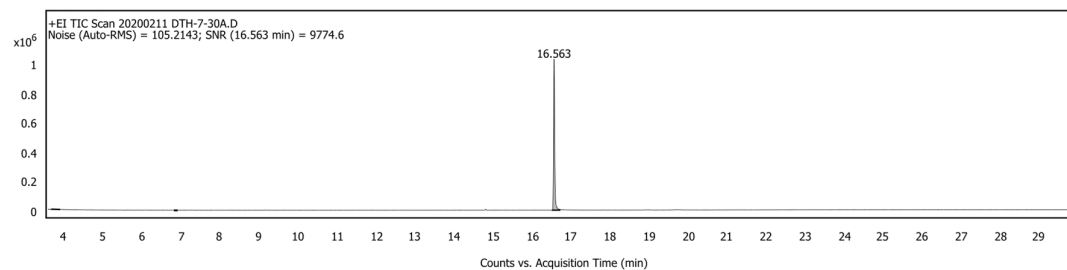

Figure 1. GC trace of 1 (X = O).

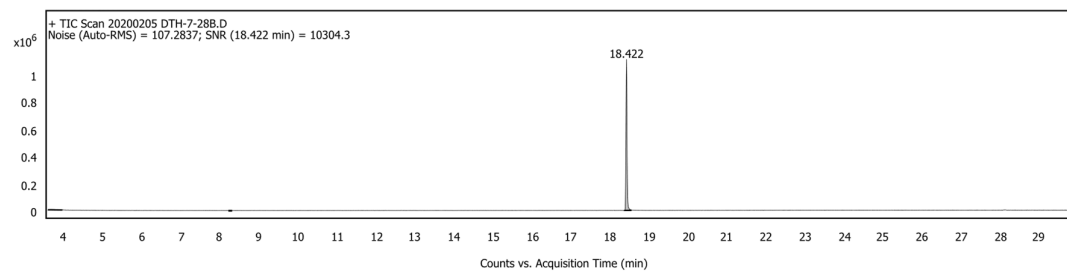

Figure 2. GC trace of 2 (X = S).



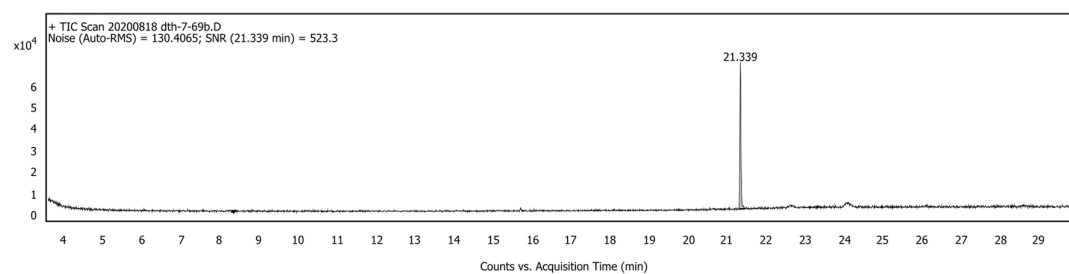Figure 3. GC trace of **3** (X = SO).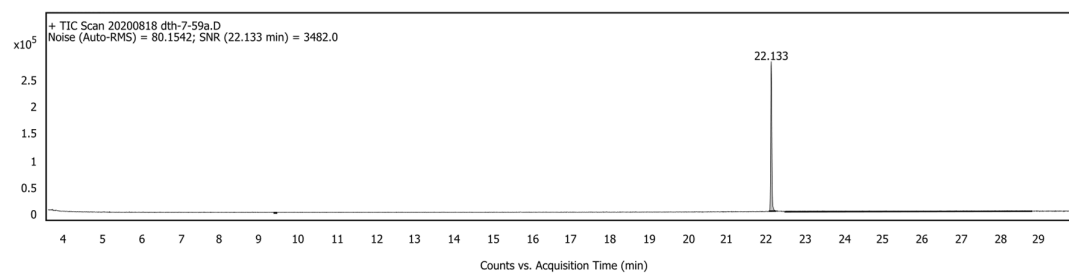Figure 4. GC trace of **4** (X = SO<sub>2</sub>).Crystallographic Packing diagrams of **1** - **4**.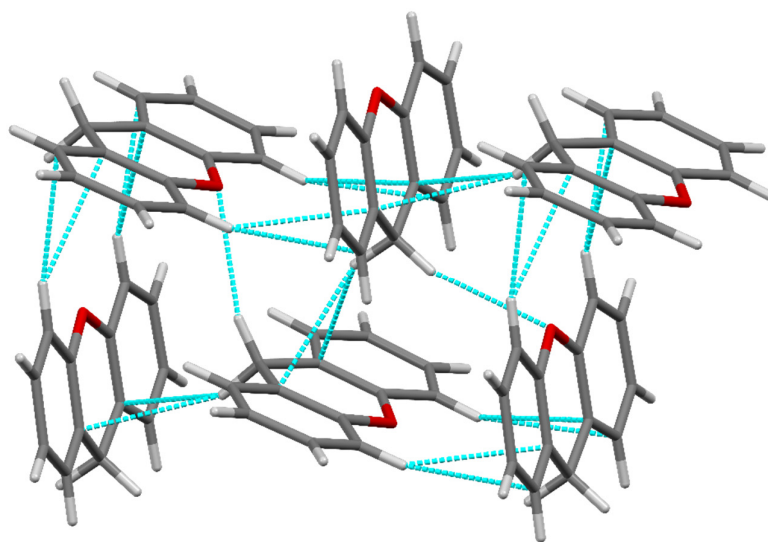Figure 5. Solid-state packing arrangement of **1**.

SUPPORTING INFORMATION

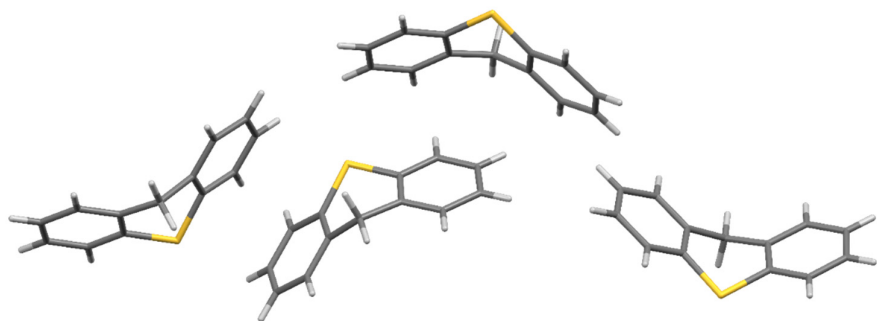

Figure 6. Solid-state packing arrangement of **2**.

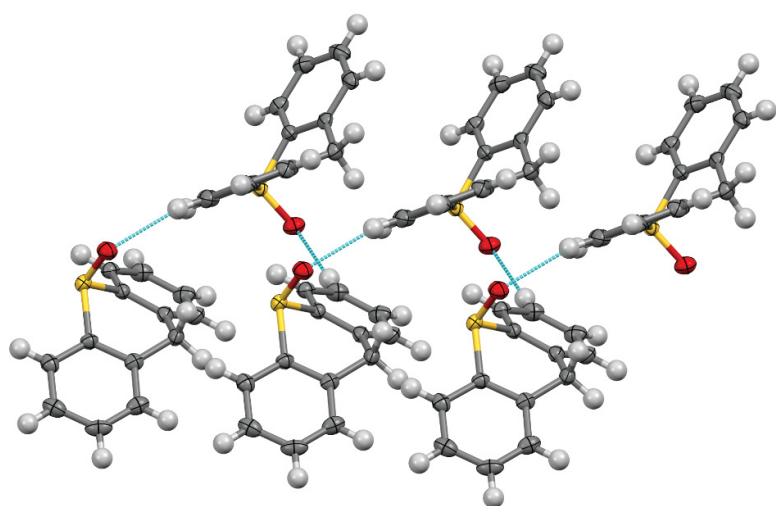

Figure 7. Solid-state packing arrangement of **3**, highlighting the intermolecular H-bonding chains

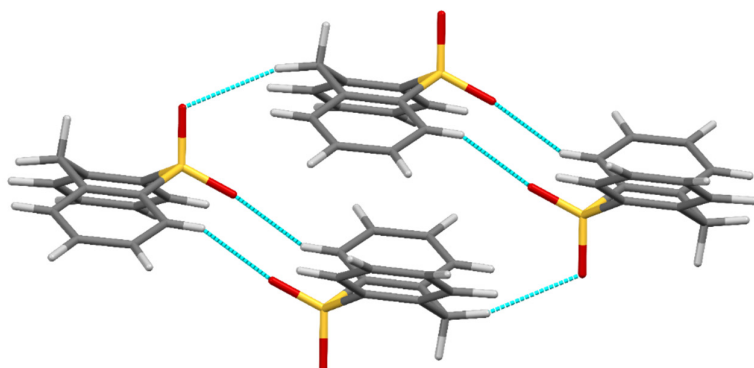

Figure 8. Solid-state packing arrangement of **4**.

Solution ( $10^{-5}$  M, ACN) absorbance, emission, and excitation spectra.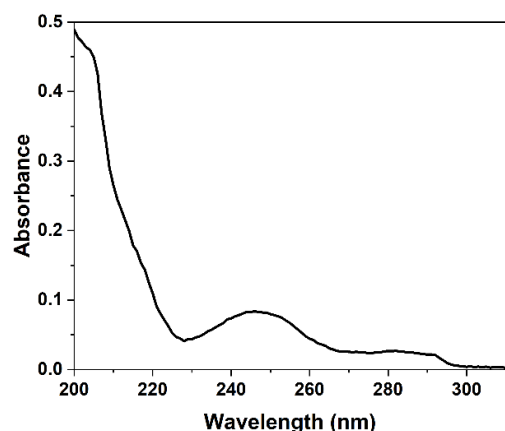Figure 9.a Absorption spectrum of **1** (X = O) in acetonitrile ( $10^{-5}$  M).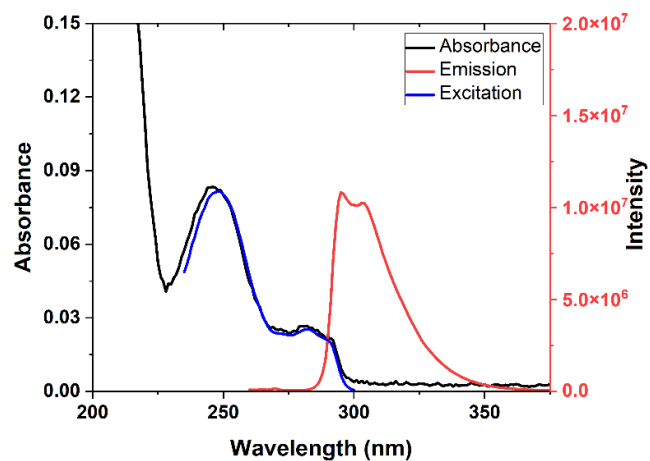Figure 9.b Absorption, Emission ( $\lambda_{ex}$  = 250 nm) and excitation ( $\lambda_{em}$  = 310 nm) spectra of **1** (X = O) in acetonitrile ( $10^{-5}$  M).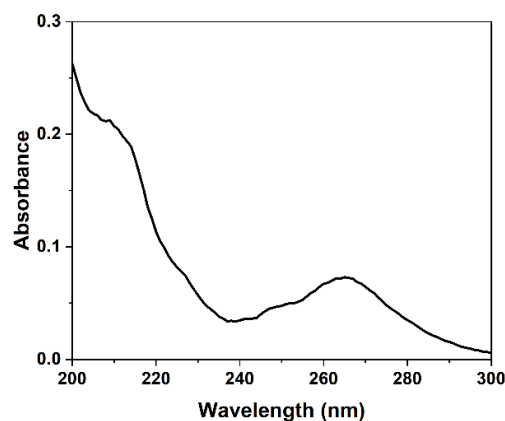Figure 10.a Absorption spectrum of **2** (X = S) in acetonitrile ( $10^{-5}$  M).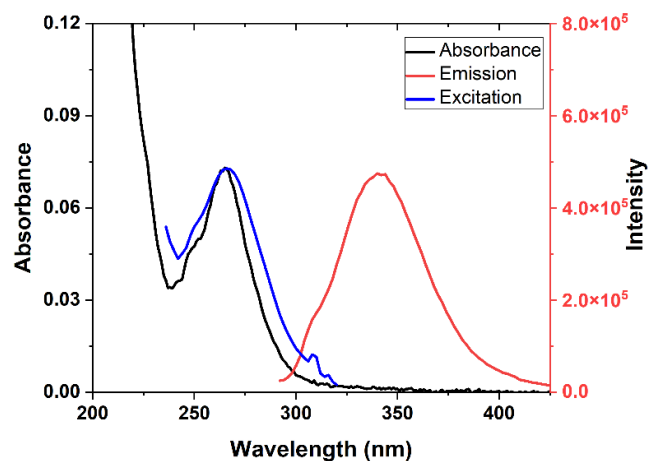Figure 10.b Absorption, Emission ( $\lambda_{ex}$  = 265 nm) and excitation ( $\lambda_{em}$  = 340 nm) spectra of **2** (X = S) in acetonitrile ( $10^{-5}$  M).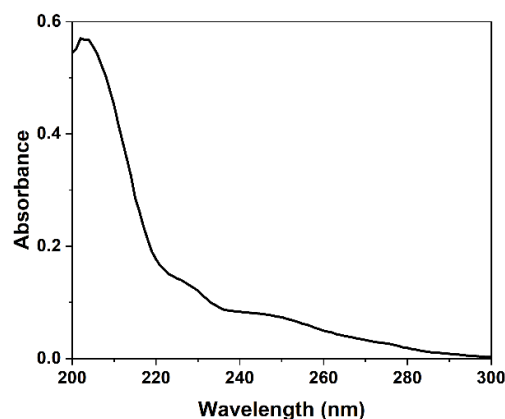Figure 11.a Absorption spectrum of **3** (X = SO) in acetonitrile ( $10^{-5}$  M).

## SUPPORTING INFORMATION

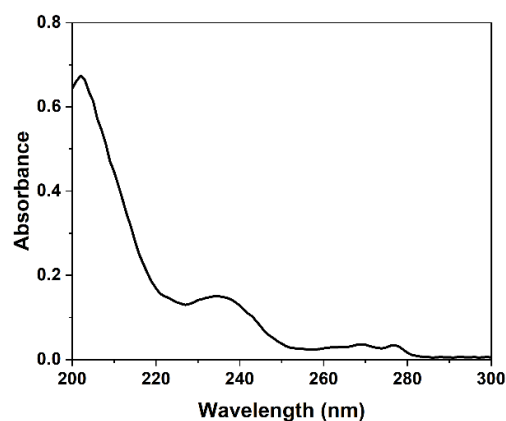

Figure 12.a Absorption spectrum of **4** ( $X = \text{SO}_2$ ) in acetonitrile ( $10^{-5}$  M).

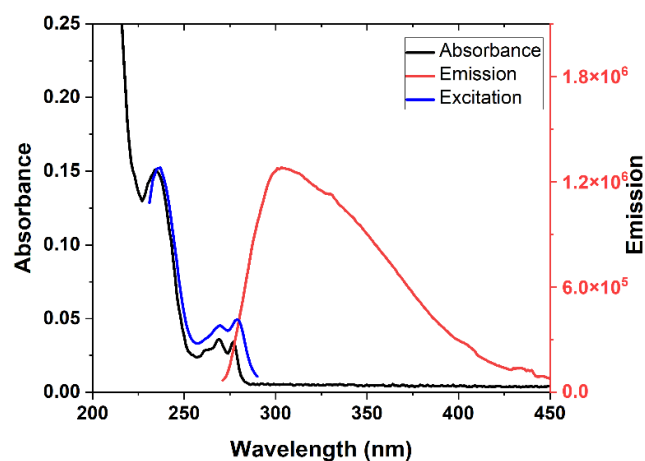

Figure 12.b Absorption, Emission ( $\lambda_{\text{ex}} = 240$  nm) and excitation ( $\lambda_{\text{em}} = 306$  nm) spectra of **4** ( $X = \text{SO}_2$ ) in acetonitrile ( $10^{-5}$  M).

## Solution (5-50 mM, ACN) absorbance spectra.

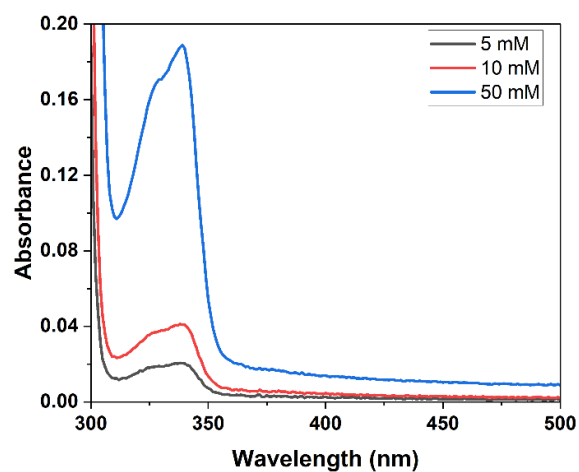

Figure 13.a Absorption spectra of **1** ( $X = \text{O}$ ) at different concentrations in acetonitrile.

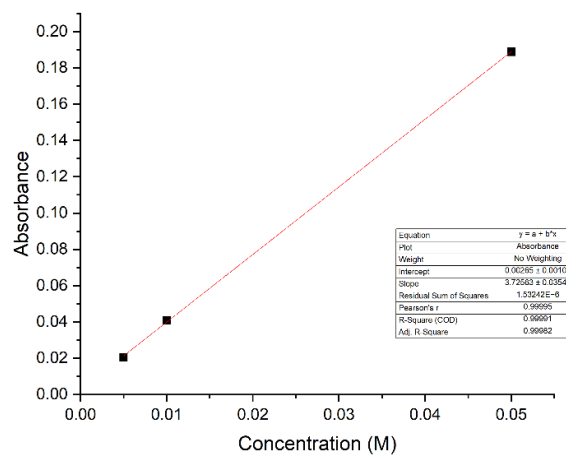

Figure 13.b Beer-Lambert plot of variable concentrations of **1**.

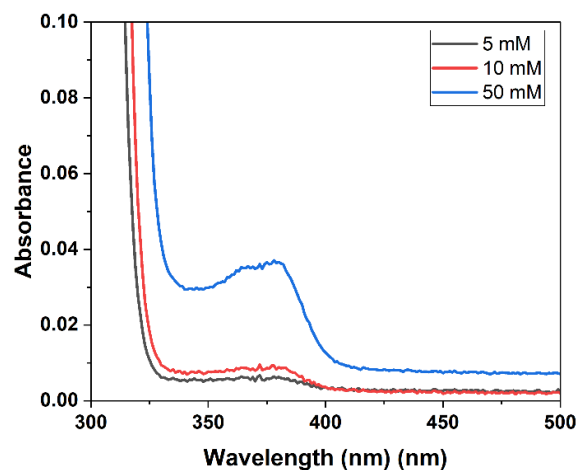

Figure 14.a Absorption spectra of **2** (X = S) at different concentrations in acetonitrile.

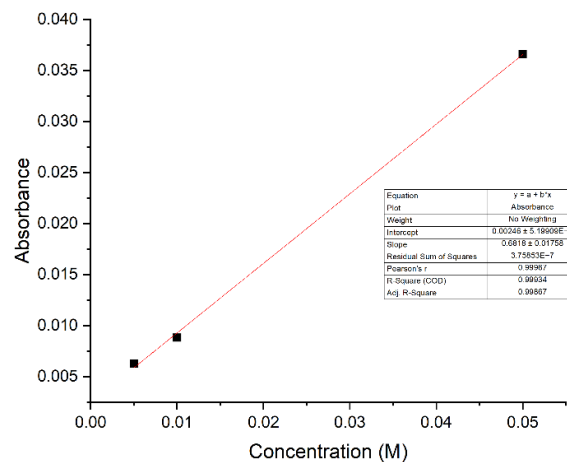

Figure 14.b Beer-Lambert plot of variable concentrations of **2**.

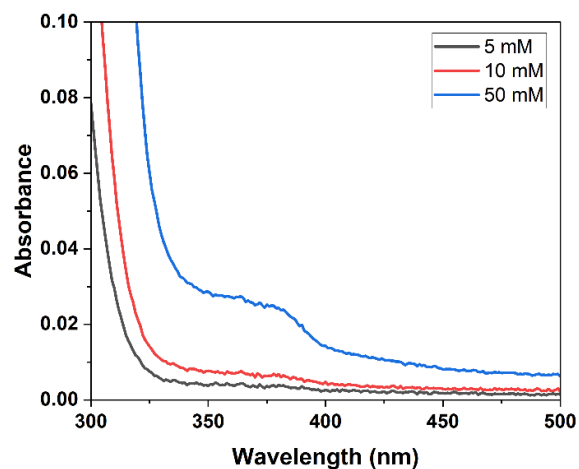

Figure 15.a Absorption spectra of **3** (X = SO) at different concentrations in acetonitrile.

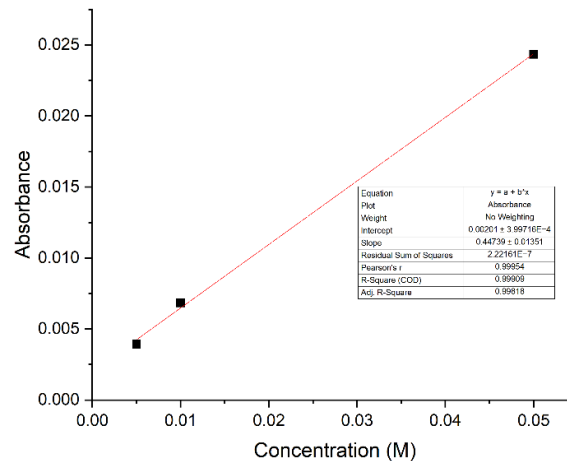

Figure 15.b Beer-Lambert plot of variable concentrations of **3**.

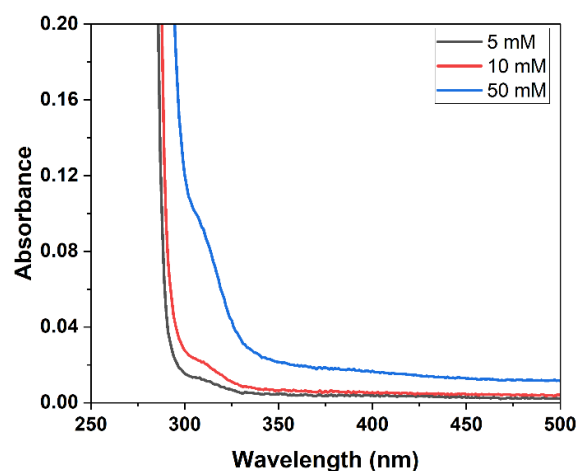

Figure 16.a Absorption spectra of **4** (X = SO<sub>2</sub>) at different concentrations in acetonitrile.

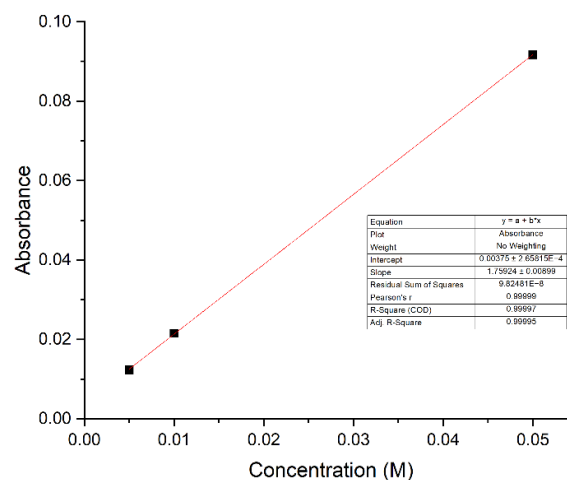

Figure 16.b Beer-Lambert plot of variable concentrations of **4**.

## SUPPORTING INFORMATION

## Emission and Excitation spectra of 1 – 4 (50 mM, ACN)

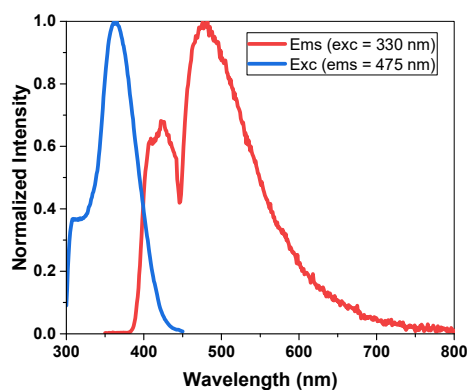Figure 17.a Emission and excitation spectra of 50 mM **1** (X = O) in ACN.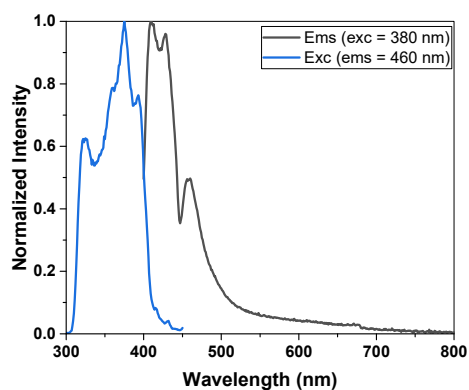Figure 17.b Emission ( $\lambda_{\text{ex}}=380$  nm) and excitation ( $\lambda_{\text{em}}=460$  nm) spectra of 50 mM **2** (X = S) in ACN.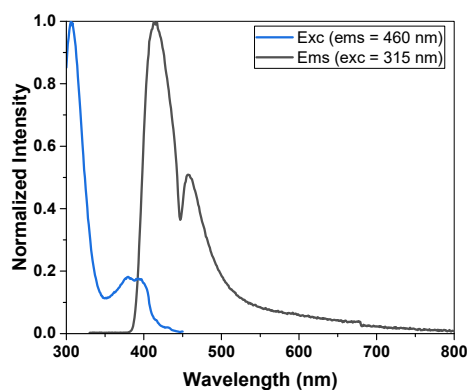Figure 18.a Emission ( $\lambda_{\text{ex}}=315$  nm) and excitation ( $\lambda_{\text{em}}=460$  nm) spectra of 50 mM **3** (X = SO) in ACN.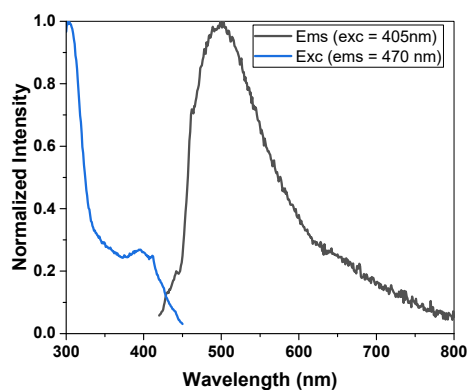Figure 18.b Emission ( $\lambda_{\text{ex}}=405$  nm) and excitation ( $\lambda_{\text{em}}=470$  nm) spectra of 50 mM **4** (X = SO<sub>2</sub>) in ACN.

## Solution (50 mM, ACN) variable temperature absorbance spectra of 1 - 4.

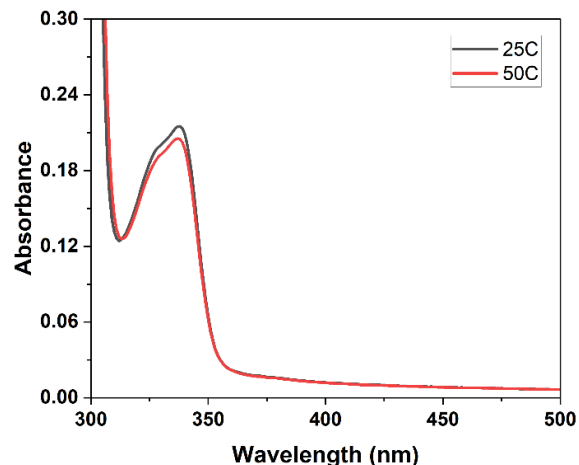Figure 19.a Absorption spectra of **1** (X = O) at different temperatures in acetonitrile (50 mM).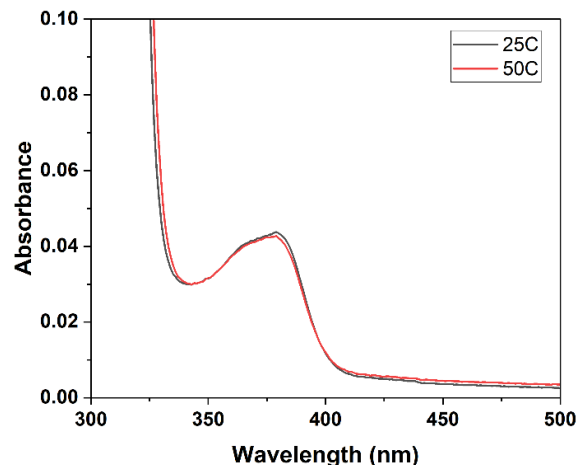Figure 19.b Absorption spectra of **2** (X = S) at different temperatures in acetonitrile (50 mM).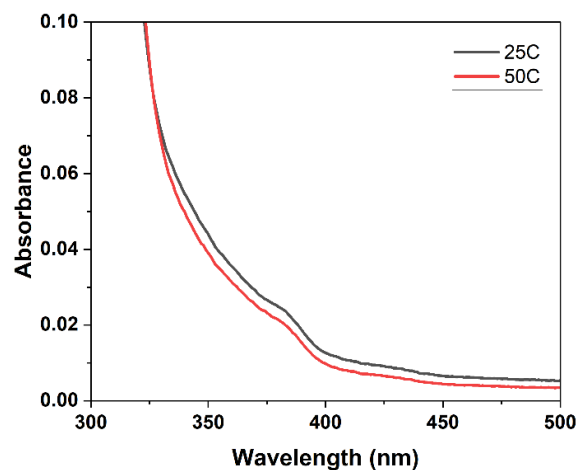Figure 20.a Absorption spectra of **3** (X = SO) at different temperatures in acetonitrile (50 mM).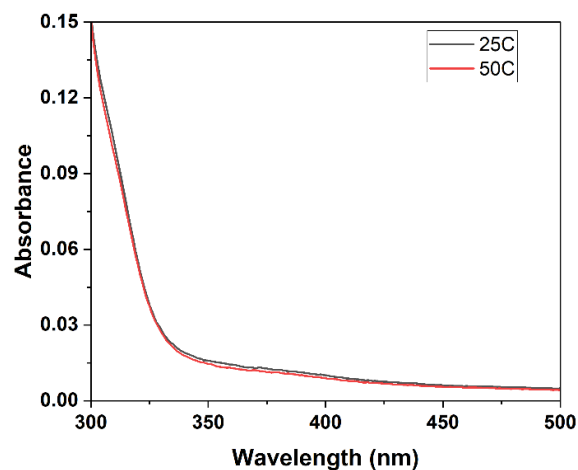Figure 20.b Absorption spectra of **4** (X = SO<sub>2</sub>) at different temperatures in acetonitrile (50 mM).

## Emission lifetimes of solutions (50 mM, ACN) of 1 - 4.

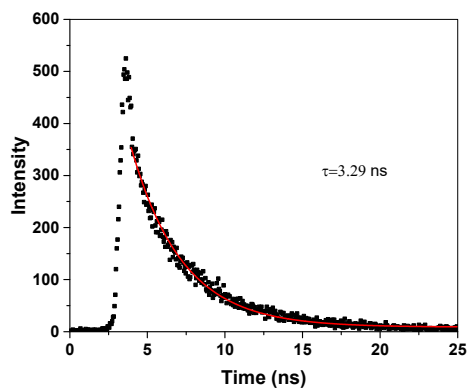Figure 21.a Emission lifetime of 50 mM **1** (X = O) in ACN with excitation at 405 nm.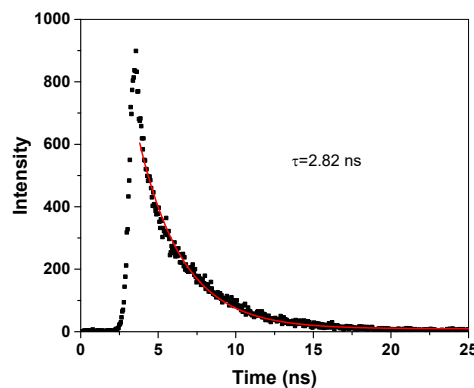Figure 21.b Emission lifetime of 50 mM **2** (X = S) in ACN with excitation at 405 nm.

## SUPPORTING INFORMATION

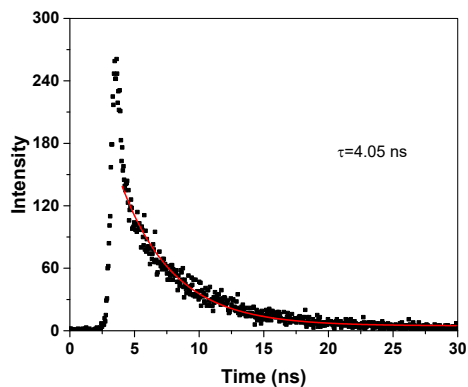

Figure 22.a Emission lifetime of 50 mM **3** (X = SO) in ACN with excitation at 405 nm.

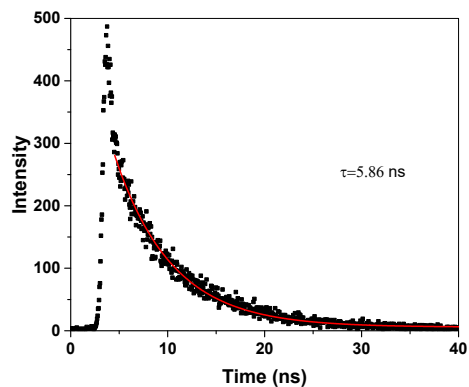

Figure 22.b Emission lifetime of 50 mM **4** (X = SO<sub>2</sub>) in ACN with excitation at 405 nm.

DFT calculated excited-state structure changes for **1** – **4**.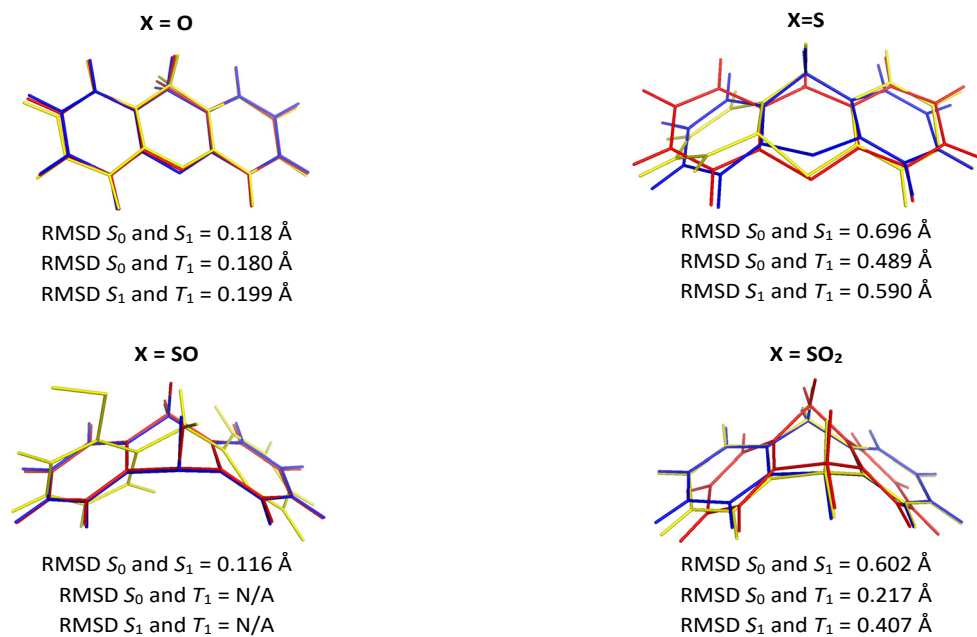

Figure 23. Calculated RMSD in structures **1** – **4** between their ground state ( $S_0$ ), singlet excited state ( $S_1$ ) and excited state triplet ( $T_1$ ) using PyMol2.5 pair fit function. For all structures shown, the following colours are used for each state: blue =  $S_0$ ; red =  $S_1$ ; yellow =  $T_1$ .



Computationally determined relevant  $S_n$  and  $T_n$  energies, and selected SOC constants for 1 – 4 in optimised  $S_1$  geometries.

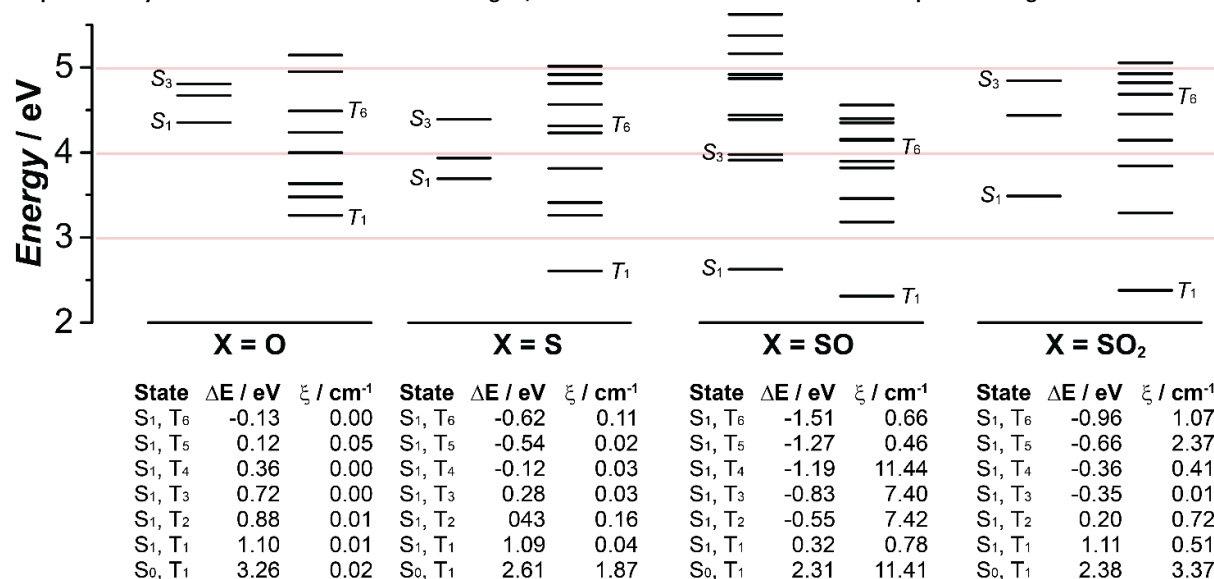

Figure 24. Using the  $S_1$ -optimised geometry, the relevant singlet and triplet energies (eV) of 1 – 4. In addition, below each energy diagram contains the magnitude of SOC constants ( $\xi$ ) in units of  $\text{cm}^{-1}$ .

Computationally determined  $S_n$  and  $T_n$  energies (eV) at optimised  $S_1$  geometries for 1 - 4.

| 1 (X = O) |                               |       | 2 (X = S) |                               |       | 3 (X = SO) |                               |       | 4 (X = SO <sub>2</sub> ) |                               |       |
|-----------|-------------------------------|-------|-----------|-------------------------------|-------|------------|-------------------------------|-------|--------------------------|-------------------------------|-------|
| State     | $S_n$ and $T_n$ energies / eV |       | State     | $S_n$ and $T_n$ energies / eV |       | State      | $S_n$ and $T_n$ energies / eV |       | State                    | $S_n$ and $T_n$ energies / eV |       |
| 1         | $S_n$                         | $T_n$ | 1         | $S_n$                         | $T_n$ | 1          | $S_n$                         | $T_n$ | 1                        | $S_n$                         | $T_n$ |
| 2         | 4.355                         | 3.260 | 2         | 3.703                         | 2.613 | 2          | 2.629                         | 2.313 | 2                        | 3.487                         | 2.380 |
| 3         | 4.670                         | 3.479 | 3         | 3.945                         | 3.270 | 3          | 3.911                         | 3.183 | 3                        | 4.435                         | 3.288 |
| 4         | 4.803                         | 3.632 | 4         | 4.402                         | 3.419 | 4          | 3.972                         | 3.459 | 4                        | 4.846                         | 3.840 |
| 5         | 5.506                         | 3.999 | 5         | 5.078                         | 3.823 | 5          | 4.389                         | 3.816 | 5                        | 5.044                         | 3.844 |
| 6         | 5.544                         | 4.237 | 6         | 5.277                         | 4.243 | 6          | 4.440                         | 3.898 | 6                        | 5.073                         | 4.142 |
| 7         | 5.913                         | 4.488 | 7         | 5.299                         | 4.324 | 7          | 4.869                         | 4.142 | 7                        | 5.215                         | 4.448 |
| 8         | 5.973                         | 4.951 | 8         | 5.643                         | 4.575 | 8          | 4.918                         | 4.153 | 8                        | 5.417                         | 4.681 |
| 9         | 5.974                         | 5.146 | 9         | 5.760                         | 4.826 | 9          | 5.159                         | 4.347 | 9                        | 5.850                         | 4.819 |
| 10        | 6.220                         | 5.423 | 10        | 5.884                         | 4.933 | 10         | 5.373                         | 4.395 | 10                       | 5.934                         | 4.926 |
|           | 6.268                         | 5.744 |           | 6.079                         | 5.028 |            | 5.621                         | 4.556 |                          | 5.968                         | 5.052 |

## SUPPORTING INFORMATION

Computationally determined SOC constants ( $\text{cm}^{-1}$ ) for singlet and triplet states in optimised  $S_1$  geometries for 1 – 4.

| 1 (X = O)                        |                |       | 2 (X = S)                        |                |        | 3 (X = SO)                       |                |        | 4 (X = SO <sub>2</sub> )         |                |        |
|----------------------------------|----------------|-------|----------------------------------|----------------|--------|----------------------------------|----------------|--------|----------------------------------|----------------|--------|
| SOC constants / $\text{cm}^{-1}$ |                |       | SOC constants / $\text{cm}^{-1}$ |                |        | SOC constants / $\text{cm}^{-1}$ |                |        | SOC constants / $\text{cm}^{-1}$ |                |        |
| T <sub>n</sub>                   | S <sub>n</sub> | ξ     | T <sub>n</sub>                   | S <sub>n</sub> | ξ      | T <sub>n</sub>                   | S <sub>n</sub> | ξ      | T <sub>n</sub>                   | S <sub>n</sub> | ξ      |
| 1                                | 0              | 0.022 | 1                                | 0              | 1.864  | 1                                | 0              | 11.413 | 1                                | 0              | 3.368  |
| 1                                | 1              | 0.010 | 1                                | 1              | 0.042  | 1                                | 1              | 0.778  | 1                                | 1              | 0.508  |
| 1                                | 2              | 0.010 | 1                                | 2              | 0.010  | 1                                | 2              | 2.360  | 1                                | 2              | 0.400  |
| 1                                | 3              | 0.000 | 1                                | 3              | 0.010  | 1                                | 3              | 2.094  | 1                                | 3              | 3.179  |
| 2                                | 0              | 0.000 | 2                                | 0              | 0.086  | 2                                | 0              | 5.375  | 2                                | 0              | 0.968  |
| 2                                | 1              | 0.000 | 2                                | 1              | 0.156  | 2                                | 1              | 7.418  | 2                                | 1              | 0.725  |
| 2                                | 2              | 0.010 | 2                                | 2              | 0.010  | 2                                | 2              | 2.531  | 2                                | 2              | 1.094  |
| 2                                | 3              | 0.000 | 2                                | 3              | 0.079  | 2                                | 3              | 1.005  | 2                                | 3              | 1.200  |
| 3                                | 0              | 0.000 | 3                                | 0              | 0.047  | 3                                | 0              | 1.091  | 3                                | 0              | 0.750  |
| 3                                | 1              | 0.000 | 3                                | 1              | 0.033  | 3                                | 1              | 7.396  | 3                                | 1              | 0.014  |
| 3                                | 2              | 0.036 | 3                                | 2              | 0.010  | 3                                | 2              | 3.245  | 3                                | 2              | 0.072  |
| 3                                | 3              | 0.028 | 3                                | 3              | 0.032  | 3                                | 3              | 0.825  | 3                                | 3              | 2.145  |
| 4                                | 0              | 0.120 | 4                                | 0              | 0.624  | 4                                | 0              | 15.492 | 4                                | 0              | 1.223  |
| 4                                | 1              | 0.000 | 4                                | 1              | 0.032  | 4                                | 1              | 11.436 | 4                                | 1              | 0.411  |
| 4                                | 2              | 0.010 | 4                                | 2              | 0.017  | 4                                | 2              | 1.980  | 4                                | 2              | 0.024  |
| 4                                | 3              | 0.000 | 4                                | 3              | 0.022  | 4                                | 3              | 1.612  | 4                                | 3              | 1.113  |
| 5                                | 0              | 0.045 | 5                                | 0              | 1.001  | 5                                | 0              | 4.220  | 5                                | 0              | 2.226  |
| 5                                | 1              | 0.050 | 5                                | 1              | 0.022  | 5                                | 1              | 0.457  | 5                                | 1              | 2.369  |
| 5                                | 2              | 0.010 | 5                                | 2              | 0.032  | 5                                | 2              | 1.239  | 5                                | 2              | 1.337  |
| 5                                | 3              | 0.010 | 5                                | 3              | 0.010  | 5                                | 3              | 0.367  | 5                                | 3              | 0.261  |
| 6                                | 0              | 0.000 | 6                                | 0              | 0.112  | 6                                | 0              | 1.480  | 6                                | 0              | 0.073  |
| 6                                | 1              | 0.000 | 6                                | 1              | 0.114  | 6                                | 1              | 0.658  | 6                                | 1              | 1.071  |
| 6                                | 2              | 0.014 | 6                                | 2              | 0.024  | 6                                | 2              | 1.610  | 6                                | 2              | 0.311  |
| 6                                | 3              | 0.036 | 6                                | 3              | 0.073  | 6                                | 3              | 1.104  | 6                                | 3              | 0.042  |
| 7                                | 0              | 0.022 | 7                                | 0              | 0.579  | 7                                | 0              | 0.997  | 7                                | 0              | 1.851  |
| 7                                | 1              | 0.000 | 7                                | 1              | 0.041  | 7                                | 1              | 2.942  | 7                                | 1              | 0.500  |
| 7                                | 2              | 0.000 | 7                                | 2              | 0.010  | 7                                | 2              | 0.553  | 7                                | 2              | 0.408  |
| 7                                | 3              | 0.010 | 7                                | 3              | 0.010  | 7                                | 3              | 1.737  | 7                                | 3              | 3.309  |
| 8                                | 0              | 0.000 | 8                                | 0              | 0.372  | 8                                | 0              | 9.113  | 8                                | 0              | 0.726  |
| 8                                | 1              | 0.010 | 8                                | 1              | 0.041  | 8                                | 1              | 6.555  | 8                                | 1              | 2.044  |
| 8                                | 2              | 0.036 | 8                                | 2              | 0.022  | 8                                | 2              | 0.272  | 8                                | 2              | 0.686  |
| 8                                | 3              | 0.010 | 8                                | 3              | 0.024  | 8                                | 3              | 1.126  | 8                                | 3              | 11.640 |
| 9                                | 0              | 0.010 | 9                                | 0              | 108.55 | 9                                | 0              | 13.883 | 9                                | 0              | 3.343  |
| 9                                | 1              | 0.010 | 9                                | 1              | 8.407  | 9                                | 1              | 27.915 | 9                                | 1              | 4.398  |
| 9                                | 2              | 0.000 | 9                                | 2              | 4.999  | 9                                | 2              | 2.243  | 9                                | 2              | 3.465  |
| 9                                | 3              | 0.000 | 9                                | 3              | 1.233  | 9                                | 3              | 2.486  | 9                                | 3              | 0.422  |
| 10                               | 0              | 0.000 | 10                               | 0              | 0.578  | 10                               | 0              | 2.982  | 10                               | 0              | 0.175  |
| 10                               | 1              | 0.000 | 10                               | 1              | 0.193  | 10                               | 1              | 7.023  | 10                               | 1              | 1.291  |
| 10                               | 2              | 0.010 | 10                               | 2              | 0.024  | 10                               | 2              | 2.587  | 10                               | 2              | 1.655  |
| 10                               | 3              | 0.036 | 10                               | 3              | 0.064  | 10                               | 3              | 0.134  | 10                               | 3              | 0.993  |

Computationally determined  $S_n$  and  $T_n$  energies (eV) at optimised  $S_0$  geometries for 1 - 4.

| 1 (X = O)                     |       |       | 2 (X = S)                     |       |       | 3 (X = SO)                    |       |       | 4 (X = SO <sub>2</sub> )      |       |       |
|-------------------------------|-------|-------|-------------------------------|-------|-------|-------------------------------|-------|-------|-------------------------------|-------|-------|
| $S_n$ and $T_n$ energies / eV |       |       | $S_n$ and $T_n$ energies / eV |       |       | $S_n$ and $T_n$ energies / eV |       |       | $S_n$ and $T_n$ energies / eV |       |       |
| State                         | $S_n$ | $T_n$ |
| 1                             | 4.599 | 3.415 | 1                             | 4.589 | 3.424 | 1                             | 3.988 | 3.438 | 1                             | 5.064 | 3.488 |
| 2                             | 4.847 | 3.615 | 2                             | 4.640 | 3.434 | 2                             | 4.779 | 3.523 | 2                             | 5.135 | 3.580 |
| 3                             | 5.021 | 3.890 | 3                             | 4.933 | 4.089 | 3                             | 4.934 | 3.739 | 3                             | 5.271 | 4.359 |
| 4                             | 5.672 | 4.220 | 4                             | 5.004 | 4.353 | 4                             | 5.082 | 4.344 | 4                             | 5.567 | 4.398 |
| 5                             | 5.728 | 4.393 | 5                             | 5.546 | 4.381 | 5                             | 5.084 | 4.384 | 5                             | 5.601 | 4.532 |
| 6                             | 6.019 | 4.592 | 6                             | 5.625 | 4.395 | 6                             | 5.156 | 4.457 | 6                             | 5.830 | 4.598 |
| 7                             | 6.066 | 5.029 | 7                             | 5.783 | 4.828 | 7                             | 5.294 | 4.606 | 7                             | 5.937 | 5.006 |
| 8                             | 6.139 | 5.187 | 8                             | 5.954 | 4.848 | 8                             | 5.341 | 4.757 | 8                             | 6.027 | 5.089 |
| 9                             | 6.348 | 5.628 | 9                             | 5.990 | 5.031 | 9                             | 5.702 | 4.843 | 9                             | 6.126 | 5.291 |
| 10                            | 6.423 | 5.854 | 10                            | 6.054 | 5.221 | 10                            | 5.717 | 4.898 | 10                            | 6.170 | 5.596 |

Computationally determined SOC constants (cm<sup>-1</sup>) for singlet and triplet states in optimised  $S_0$  geometries for 1 - 4.

| 1 (X = O)                        |       |       | 2 (X = S)                        |       |         | 3 (X = SO)                       |       |        | 4 (X = SO <sub>2</sub> )         |       |       |
|----------------------------------|-------|-------|----------------------------------|-------|---------|----------------------------------|-------|--------|----------------------------------|-------|-------|
| SOC constants / cm <sup>-1</sup> |       |       | SOC constants / cm <sup>-1</sup> |       |         | SOC constants / cm <sup>-1</sup> |       |        | SOC constants / cm <sup>-1</sup> |       |       |
| $T_n$                            | $S_n$ | $\xi$ | $T_n$                            | $S_n$ | $\xi$   | $T_n$                            | $S_n$ | $\xi$  | $T_n$                            | $S_n$ | $\xi$ |
| 1                                | 0     | 0.180 | 1                                | 0     | 13.353  | 1                                | 0     | 3.787  | 1                                | 0     | 2.560 |
| 1                                | 1     | 0.148 | 1                                | 1     | 1.051   | 1                                | 1     | 6.862  | 1                                | 1     | 0.154 |
| 1                                | 2     | 0.050 | 1                                | 2     | 3.602   | 1                                | 2     | 0.345  | 1                                | 2     | 0.811 |
| 1                                | 3     | 0.120 | 1                                | 3     | 1.474   | 1                                | 3     | 0.440  | 1                                | 3     | 0.037 |
| 2                                | 0     | 0.130 | 2                                | 0     | 1.185   | 2                                | 0     | 6.799  | 2                                | 0     | 1.238 |
| 2                                | 1     | 0.130 | 2                                | 1     | 0.187   | 2                                | 1     | 4.496  | 2                                | 1     | 1.788 |
| 2                                | 2     | 0.014 | 2                                | 2     | 7.175   | 2                                | 2     | 20.273 | 2                                | 2     | 0.024 |
| 2                                | 3     | 0.022 | 2                                | 3     | 1.429   | 2                                | 3     | 2.590  | 2                                | 3     | 2.359 |
| 3                                | 0     | 0.130 | 3                                | 0     | 9.392   | 3                                | 0     | 12.709 | 3                                | 0     | 0.269 |
| 3                                | 1     | 0.060 | 3                                | 1     | 1.916   | 3                                | 1     | 2.854  | 3                                | 1     | 0.717 |
| 3                                | 2     | 0.190 | 3                                | 2     | 2.446   | 3                                | 2     | 31.249 | 3                                | 2     | 0.072 |
| 3                                | 3     | 0.032 | 3                                | 3     | 0.485   | 3                                | 3     | 2.268  | 3                                | 3     | 0.313 |
| 4                                | 0     | 0.316 | 4                                | 0     | 3.511   | 4                                | 0     | 0.335  | 4                                | 0     | 0.975 |
| 4                                | 1     | 0.362 | 4                                | 1     | 2.458   | 4                                | 1     | 1.168  | 4                                | 1     | 0.078 |
| 4                                | 2     | 0.100 | 4                                | 2     | 1.194   | 4                                | 2     | 2.442  | 4                                | 2     | 0.586 |
| 4                                | 3     | 0.030 | 4                                | 3     | 1.909   | 4                                | 3     | 1.721  | 4                                | 3     | 0.022 |
| 5                                | 0     | 0.187 | 5                                | 0     | 30.106  | 5                                | 0     | 4.220  | 5                                | 0     | 3.133 |
| 5                                | 1     | 0.076 | 5                                | 1     | 1.901   | 5                                | 1     | 10.853 | 5                                | 1     | 0.020 |
| 5                                | 2     | 0.020 | 5                                | 2     | 2.624   | 5                                | 2     | 0.180  | 5                                | 2     | 0.348 |
| 5                                | 3     | 0.020 | 5                                | 3     | 0.289   | 5                                | 3     | 0.528  | 5                                | 3     | 0.054 |
| 6                                | 0     | 0.350 | 6                                | 0     | 2.635   | 6                                | 0     | 6.897  | 6                                | 0     | 1.970 |
| 6                                | 1     | 0.040 | 6                                | 1     | 1.771   | 6                                | 1     | 16.639 | 6                                | 1     | 2.465 |
| 6                                | 2     | 0.064 | 6                                | 2     | 5.321   | 6                                | 2     | 0.033  | 6                                | 2     | 0.017 |
| 6                                | 3     | 0.054 | 6                                | 3     | 0.222   | 6                                | 3     | 4.386  | 6                                | 3     | 2.932 |
| 7                                | 0     | 0.061 | 7                                | 0     | 6.967   | 7                                | 0     | 2.761  | 7                                | 0     | 2.009 |
| 7                                | 1     | 0.067 | 7                                | 1     | 0.528   | 7                                | 1     | 6.337  | 7                                | 1     | 0.088 |
| 7                                | 2     | 0.160 | 7                                | 2     | 3.031   | 7                                | 2     | 5.210  | 7                                | 2     | 0.589 |
| 7                                | 3     | 0.050 | 7                                | 3     | 0.871   | 7                                | 3     | 0.889  | 7                                | 3     | 0.057 |
| 8                                | 0     | 0.200 | 8                                | 0     | 48.335  | 8                                | 0     | 32.621 | 8                                | 0     | 0.734 |
| 8                                | 1     | 0.060 | 8                                | 1     | 2.067   | 8                                | 1     | 46.112 | 8                                | 1     | 0.558 |
| 8                                | 2     | 0.184 | 8                                | 2     | 2.766   | 8                                | 2     | 0.453  | 8                                | 2     | 0.051 |
| 8                                | 3     | 0.030 | 8                                | 3     | 1.211   | 8                                | 3     | 1.824  | 8                                | 3     | 1.808 |
| 9                                | 0     | 0.972 | 9                                | 0     | 103.819 | 9                                | 0     | 7.757  | 9                                | 0     | 1.268 |
| 9                                | 1     | 0.340 | 9                                | 1     | 3.955   | 9                                | 1     | 0.174  | 9                                | 1     | 0.732 |
| 9                                | 2     | 0.020 | 9                                | 2     | 1.542   | 9                                | 2     | 1.835  | 9                                | 2     | 1.564 |
| 9                                | 3     | 0.080 | 9                                | 3     | 1.774   | 9                                | 3     | 1.417  | 9                                | 3     | 1.446 |
| 10                               | 0     | 0.290 | 10                               | 0     | 0.790   | 10                               | 0     | 58.578 | 10                               | 0     | 8.087 |
| 10                               | 1     | 0.070 | 10                               | 1     | 1.738   | 10                               | 1     | 23.222 | 10                               | 1     | 8.021 |
| 10                               | 2     | 0.971 | 10                               | 2     | 2.073   | 10                               | 2     | 0.127  | 10                               | 2     | 0.437 |
| 10                               | 3     | 0.193 | 10                               | 3     | 0.559   | 10                               | 3     | 3.030  | 10                               | 3     | 8.771 |

## SUPPORTING INFORMATION

Excitation and emission spectra of crystalline samples of 1 – 4 (200  $\mu$ s delay).

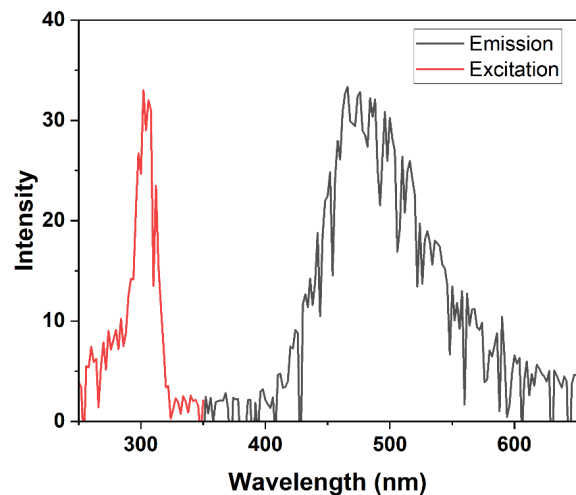

Figure 25.a Solid-state emission ( $\lambda_{\text{ex}} = 306$  nm) and excitation ( $\lambda_{\text{em}} = 475$  nm) spectra of **1** ( $X = O$ ).

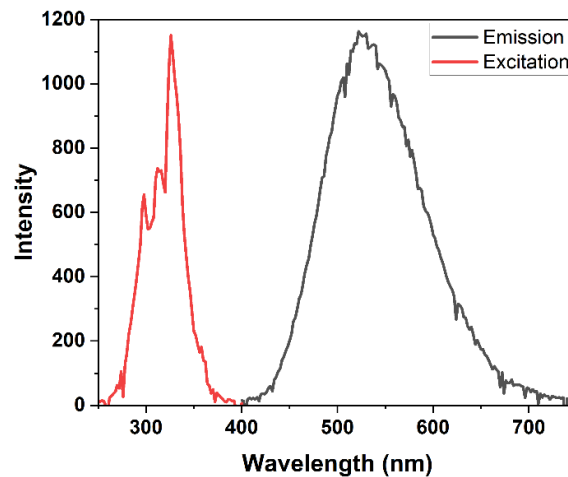

Figure 25.b Solid-state emission ( $\lambda_{\text{ex}} = 326$  nm) and excitation ( $\lambda_{\text{em}} = 530$  nm) spectra of **2** ( $X = S$ ).

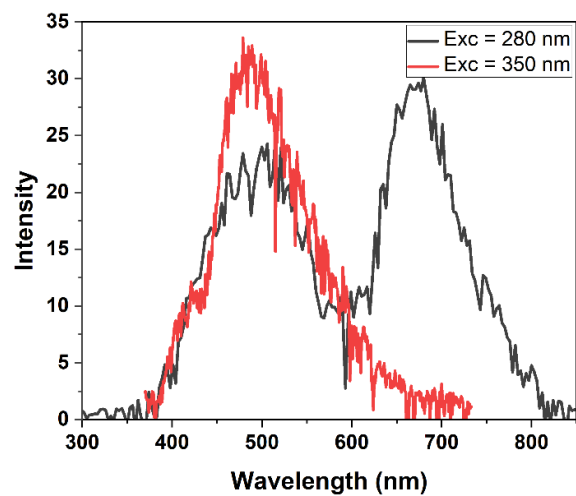

Figure 26.a Solid-state emission ( $\lambda_{\text{ex}} = 280$  nm or 350 nm) spectra of **3** ( $X = SO$ ).

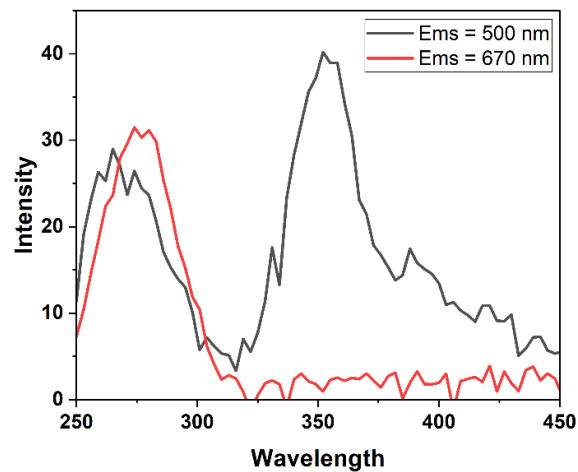

Figure 26.b Solid-state excitation ( $\lambda_{\text{em}} = 500$  nm or 670 nm) spectra of **3** ( $X = SO$ ).

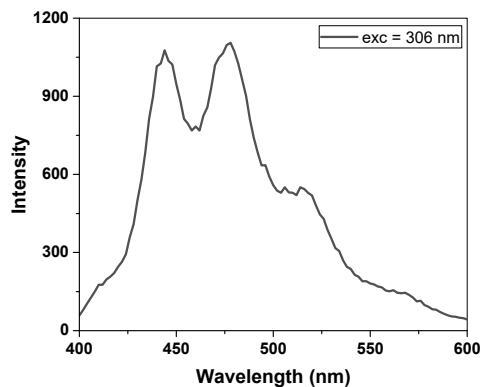

Figure 27.a Solid-state emission ( $\lambda_{\text{exc}} = 306$  nm) spectrum of **4** ( $X = \text{SO}_2$ ).

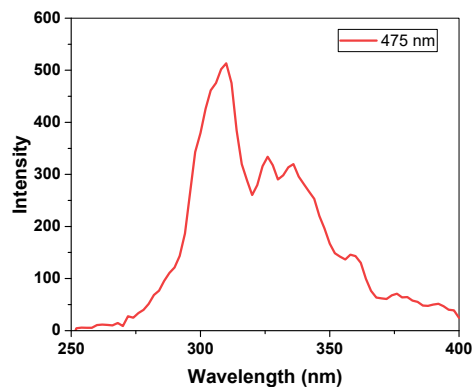

Figure 27.b Solid-state excitation ( $\lambda_{\text{em}} = 475$  nm) spectrum of **4** ( $X = \text{SO}_2$ ).

#### Variable Temperature Emission of Crystalline Samples of **1** – **4** (200 $\mu\text{s}$ delay).

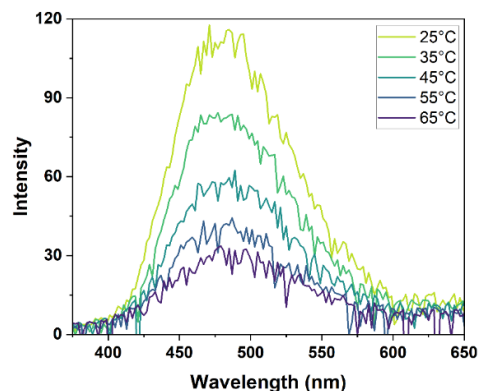

Figure 28.a Emission spectra of **1** ( $X = \text{O}$ ,  $\lambda_{\text{exc}} = 310$  nm) at various temperatures.

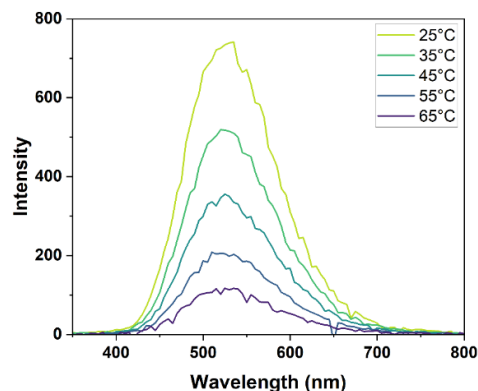

Figure 28.b Emission spectra of **2** ( $X = \text{S}$ ,  $\lambda_{\text{exc}} = 326$  nm) at various temperatures.

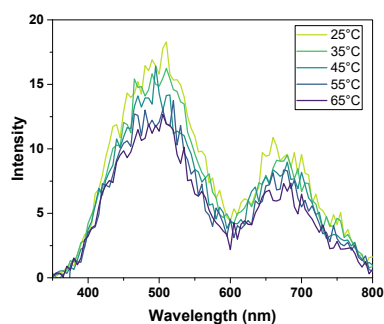

Figure 29.a Emission spectra of **3** ( $X = \text{SO}$ ,  $\lambda_{\text{exc}} = 280$  nm) at various temperatures..

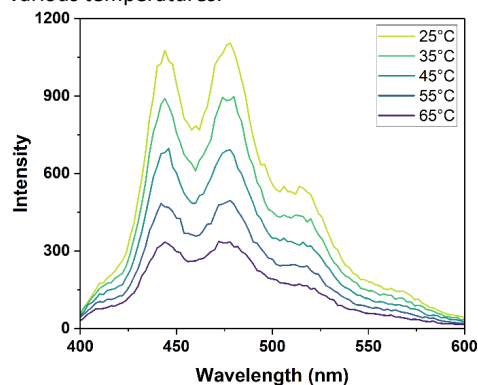

Figure 29.b Emission spectra of **4** ( $X = \text{SO}_2$ ,  $\lambda_{\text{exc}} = 306$  nm) at various temperatures.

## SUPPORTING INFORMATION

Emission lifetimes of crystalline solids 1 – 4 (200  $\mu$ s delay).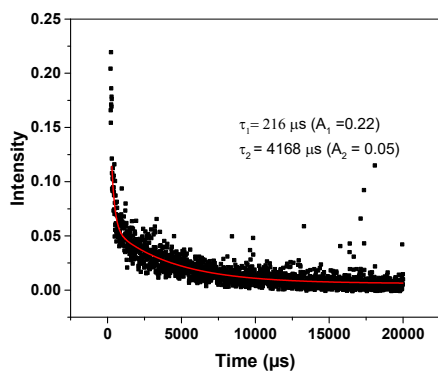

Figure 30.a Emission (475 nm) lifetime of solid 1 (X = O) with excitation at 310 nm.

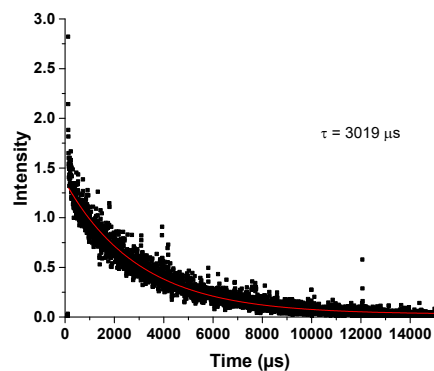

Figure 30.b Emission (530 nm) lifetime of solid 2 (X = S) with excitation at 326 nm.

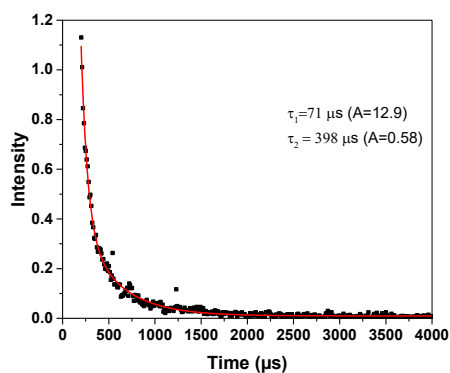

Figure 31.a Emission (500 nm) lifetime of solid 3 (X = SO) with excitation at 280 nm.

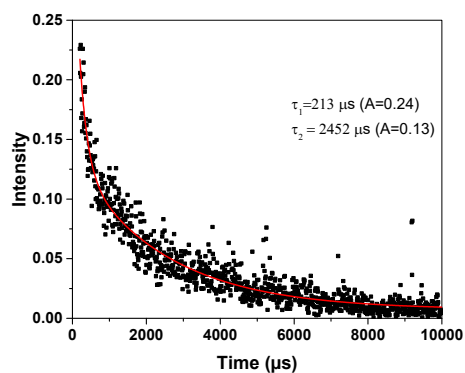

Figure 31.b Emission (670 nm) lifetime of solid 3 (X = SO) with excitation at 280 nm.

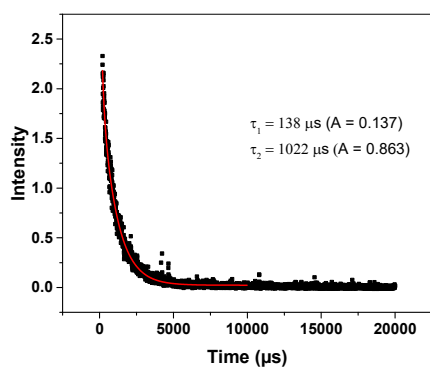Figure 32.a Emission (475 nm) lifetime of solid 4 (X = SO<sub>2</sub>) with excitation at 306 nm.

Emission of Crystalline Samples under either air or N<sub>2</sub> atmosphere (200 μs delay).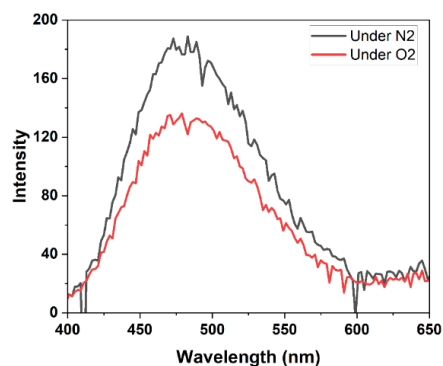

Figure 33.a X = O

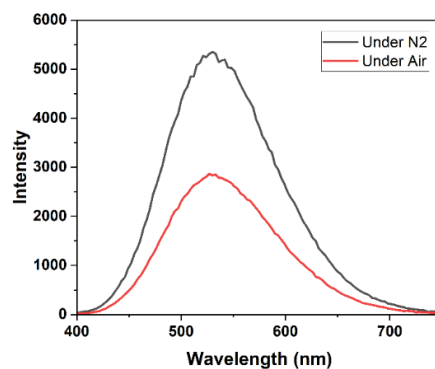

Figure 33.b X = S

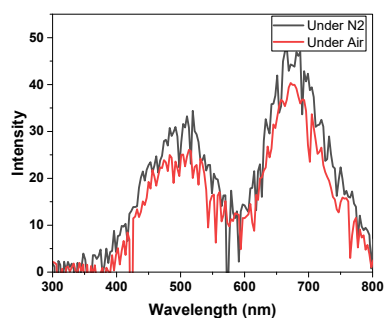

Figure 34.a X = SO.

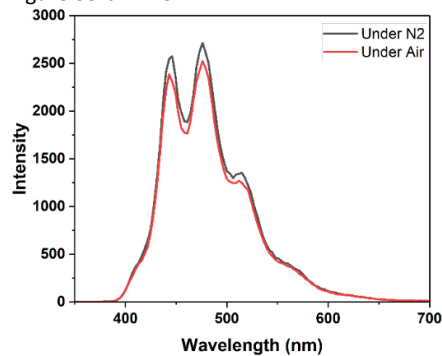Figure 34.b X = SO<sub>2</sub>

## Steady-state fluorescence of crystalline samples of 1, 2, and 4.

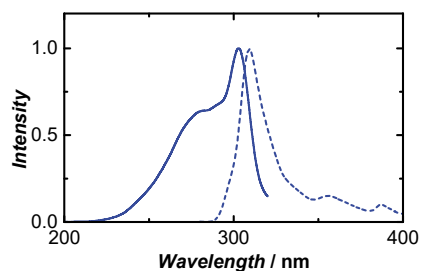Figure 35.a Emission (dashed line,  $\lambda_{\text{ex}} = 260$  nm) and excitation (solid line,  $\lambda_{\text{em}} = 340$  nm) spectra of **1** (X = O).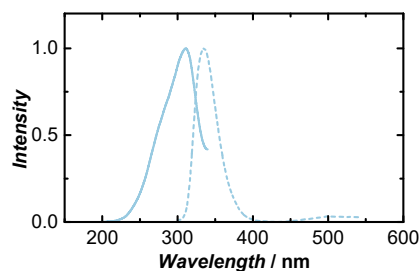Figure 35.b Emission (dashed line,  $\lambda_{\text{ex}} = 285$  nm) and excitation (solid line,  $\lambda_{\text{em}} = 360$  nm) spectra of **2** (X = S).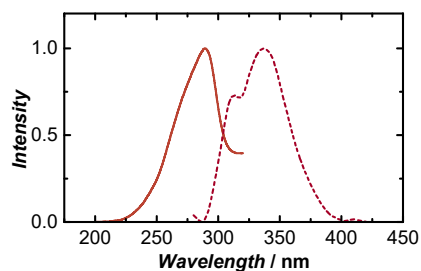Figure 36.b Emission (dashed line,  $\lambda_{\text{ex}} = 260$  nm) and excitation (solid line,  $\lambda_{\text{em}} = 340$  nm) spectra of **4** (X = SO<sub>2</sub>).

## SUPPORTING INFORMATION

## Emission lifetimes of crystalline solids 1 – 4 (prompt).

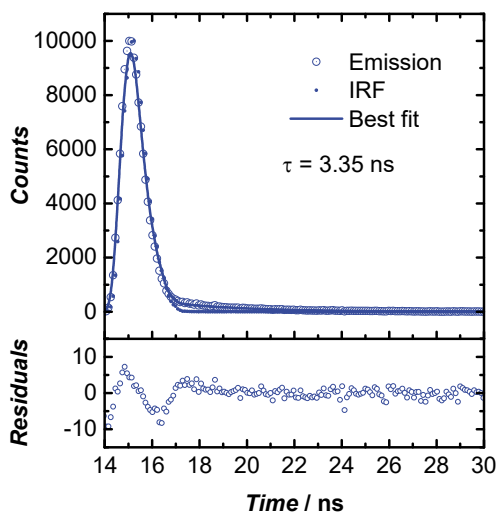

Figure 37.a Emission (320 nm) lifetime of solid **1** (X = O) with excitation at 290 nm. Raw data (open circles), Instrument response factor (IRF, solid points), best fit (line) and residuals plot of best-fit line.

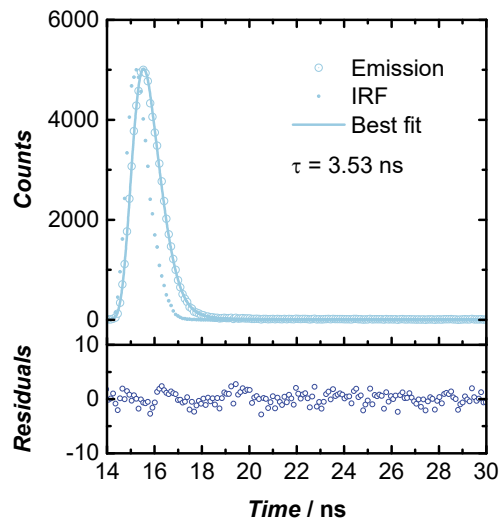

Figure 37.b Emission (385 nm) lifetime of solid **2** (X = S) with excitation at 310 nm. Raw data (open circles), Instrument response factor (IRF, solid points), best fit (line) and residuals plot of best-fit line.

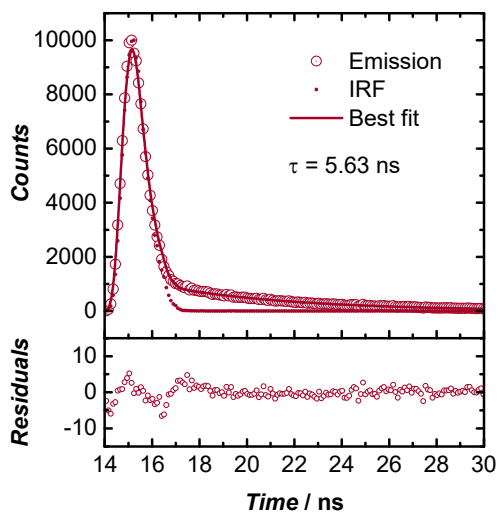

Figure 38.b Emission (340 nm) lifetime of solid **4** (X = SO<sub>2</sub>) with excitation at 290 nm. Raw data (open circles), Instrument response factor (IRF, solid points), best fit (line) and residuals plot of best-fit line.



## Irradiance power (transmittance) versus emission intensity of crystalline solids 1 – 4.

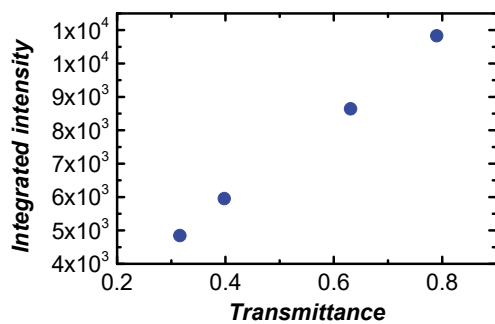

Figure 39.a X = O

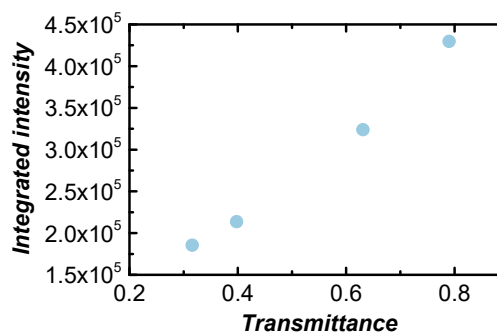

Figure 39.b X = S

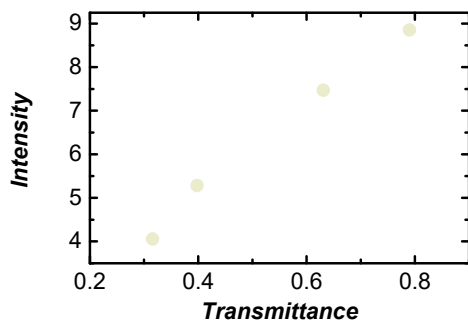

Figure 40.a X = SO.

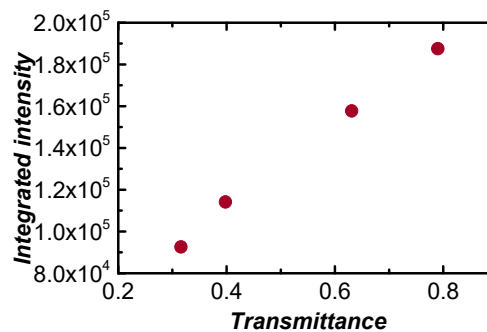Figure 40.b X = SO<sub>2</sub>

## SUPPORTING INFORMATION

## Natural Transition orbitals (NTOs) of 1 - 4.

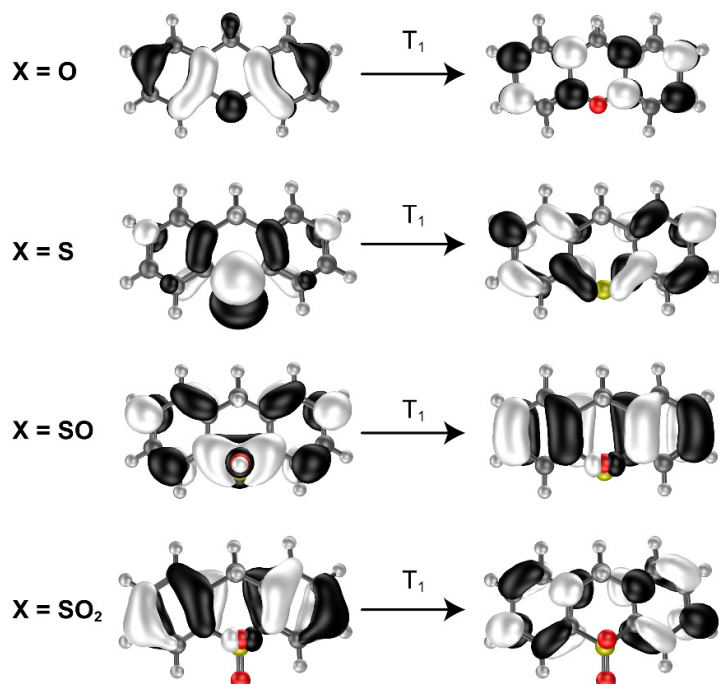Figure 41. Natural transition orbitals (NTOs) of  $T_1$  state for 1 - 4.DFT Computations Orca 5.0.3, PBE0 D4 def2-TZVP – Ground states ( $S_0$ ) of 1 - 4.

X = O

Energy: -576.052695817400Eh

Lowest IR freq: 119.48  $\text{cm}^{-1}$ 

Cartesian coordinates:

|   |                  |                  |                   |
|---|------------------|------------------|-------------------|
| O | 3.23983454815159 | 5.22175728558252 | 1.25235369268813  |
| C | 2.95508470565381 | 4.04505663058156 | 0.62540811840521  |
| C | 3.40783991635032 | 2.89644987166393 | 1.26142152707945  |
| H | 3.94883590411115 | 2.99915099782478 | 2.19437547447434  |
| C | 3.16477837408518 | 1.65864733584873 | 0.69810987099807  |
| H | 3.51843805268470 | 0.76373790103818 | 1.19650981479866  |
| C | 2.47437058999743 | 1.56623850735745 | -0.50351555153170 |
| H | 2.28342723880574 | 0.59939463598296 | -0.95323939358014 |
| C | 2.03085261185120 | 2.72061017642900 | -1.12335924738511 |
| H | 1.48866461105057 | 2.65521667969880 | -2.06181377698351 |
| C | 2.25571210184204 | 3.97762935274973 | -0.57260457142553 |
| C | 1.74442909097180 | 5.22175956457739 | -1.23305089152757 |
| H | 0.64699140887812 | 5.22176045231195 | -1.21399419383046 |
| H | 2.02310343275352 | 5.22176036264947 | -2.29252922167147 |
| C | 2.95508588705778 | 6.39845888248882 | 0.62540952832051  |
| C | 3.40784250952764 | 7.54706406485029 | 1.26142474059103  |
| H | 3.94883926592380 | 7.44436070479144 | 2.19437794924400  |
| C | 3.16478295937631 | 8.78486766311407 | 0.69811425948705  |
| H | 3.51844420791213 | 9.67977610862680 | 1.19651490613376  |
| C | 2.47437449735559 | 8.87727879839778 | -0.50351051601065 |
| H | 2.28343310390368 | 9.84412348880488 | -0.95323344618967 |
| C | 2.03085487122529 | 7.72290848896143 | -1.12335577888865 |
| H | 1.48866705907779 | 7.78830372416279 | -2.06181031661697 |
| C | 2.25571305145280 | 6.46588832150524 | -0.57260297657877 |

X = S

Energy: -898.936764454031Eh

Lowest IR freq: 56.24 cm<sup>-1</sup>

Cartesian coordinates:

|   |                   |                   |                   |
|---|-------------------|-------------------|-------------------|
| C | 0.95167393509505  | 0.45435963483867  | 0.59502651019526  |
| C | 5.07958695528255  | -2.56712200400958 | 0.18249101312026  |
| C | 5.28927959558528  | -1.89985429219280 | 1.38017639764037  |
| C | 4.48484193560784  | -0.82691502830488 | 1.72551645845916  |
| C | 3.48788495998840  | -0.40294800218172 | 0.85516905065091  |
| C | -0.23772620176672 | 0.77008900891377  | 1.24055973500243  |
| C | -1.44615484838030 | 0.38267054293573  | 0.68619774693924  |
| C | -1.46624388695895 | -0.34110422255046 | -0.49699570312058 |
| C | -0.27537487961367 | -0.65907168703725 | -1.13134874842676 |
| C | 0.94344533619894  | -0.24982160040173 | -0.60875148399299 |
| C | 2.24499894867926  | -0.51399202479884 | -1.30173722470699 |
| C | 3.28694707832020  | -1.04620433680577 | -0.36561225295192 |
| C | 4.07900883953388  | -2.14232068993634 | -0.67777515541329 |
| H | 5.69619912437423  | -3.41770146676271 | -0.08257642078374 |
| H | 6.06811869390247  | -2.22677185318637 | 2.05902596401995  |
| H | 4.61715400265511  | -0.32261822363353 | 2.67570787689932  |
| H | -0.21075928185721 | 1.30640856195226  | 2.18209483492994  |
| H | -2.37248289610863 | 0.63208634373862  | 1.19001938969607  |
| H | -2.40912177797461 | -0.65927522419541 | -0.92552070837899 |
| H | -0.28823687057256 | -1.22216691455895 | -2.05883979215692 |
| H | 2.61152815025448  | 0.44064236222222  | -1.70883365294196 |
| H | 2.10300200867235  | -1.19075479803045 | -2.14569475265459 |
| H | 3.91639580738460  | -2.65919455128378 | -1.61792702538807 |
| S | 2.47893527169799  | 0.96738046526930  | 1.30142794336389  |

X = SO

Energy: -974.098803947903 Eh

Lowest IR freq: 55.34 cm<sup>-1</sup>

Cartesian coordinates:

|   |                  |                   |                   |
|---|------------------|-------------------|-------------------|
| S | 5.59317398115394 | 0.82678385017596  | 13.38862043355899 |
| O | 4.63244306501793 | -0.23861544475183 | 13.00496755534847 |
| C | 5.06178777988837 | 1.45156471267884  | 14.97218634346463 |
| C | 5.84718016520031 | 1.20852591755411  | 16.08602657141257 |
| H | 6.80483237054276 | 0.71286454103941  | 15.96964571947892 |
| C | 5.39450492675197 | 1.59510131387897  | 17.33853324017266 |
| H | 6.00130507754494 | 1.41093535730088  | 18.21688263575961 |
| C | 4.15931490784075 | 2.21209476413914  | 17.45694320548213 |
| H | 3.79831604961765 | 2.51561545801456  | 18.43274424537232 |
| C | 3.38086017918804 | 2.45392684758564  | 16.33231885492220 |
| H | 2.42137212152406 | 2.94983067169898  | 16.43528830131152 |
| C | 3.82123289792701 | 2.07940532417784  | 15.07265500199709 |
| C | 3.02359046720496 | 2.34406005909480  | 13.83032972892309 |
| H | 2.58033492292410 | 1.39562931384908  | 13.50067413574008 |
| H | 2.20712613652967 | 3.03603256542441  | 14.04013238106344 |
| C | 3.88229738271209 | 2.86842710420871  | 12.71770864596401 |
| C | 3.49392965502536 | 3.93113925954382  | 11.91700876595198 |
| H | 2.53217860114273 | 4.40317006450863  | 12.08864855904235 |
| C | 4.32715297729031 | 4.40252633080951  | 10.91069648174634 |
| H | 4.00607500128822 | 5.23629715104806  | 10.29716439410340 |
| C | 5.56551779542255 | 3.82024965498959  | 10.69217769886528 |
| H | 6.21473645600459 | 4.19231892861238  | 9.90881312980056  |
| C | 5.96675619192191 | 2.75218212324388  | 11.48046242940798 |
| H | 6.92596551550633 | 2.27227978750198  | 11.31964537950926 |
| C | 5.12691537482939 | 2.28775434367262  | 12.47802616160096 |

## SUPPORTING INFORMATION

X = SO<sub>2</sub>

Energy: -1049.312794972365 Eh

Lowest IR freq: 56.35 cm<sup>-1</sup>

Cartesian coordinates:

|   |                   |                   |                   |
|---|-------------------|-------------------|-------------------|
| C | 4.18616782941285  | -2.28151204889230 | 2.20367642609250  |
| C | 3.71351079767973  | -3.18233494959390 | 1.26142123239435  |
| C | 3.24013971487582  | -4.41016852755999 | 1.72020406505592  |
| C | 1.81757763661600  | -4.50544308645496 | -0.56344877977066 |
| C | 2.38851509434498  | -3.26909961487884 | -0.85847228603835 |
| C | 4.18705368871365  | -2.60497196871270 | 3.55347905278815  |
| C | 3.69975880214856  | -3.82892368235576 | 3.98666781340433  |
| C | 3.21341802886866  | -4.74062511382595 | 3.06318864940288  |
| C | 0.61107826574264  | -4.91441416100636 | -1.10290198265198 |
| C | -0.04333074748904 | -4.07587445077535 | -1.99095211683013 |
| C | 0.51041579260091  | -2.84476363820273 | -2.30894439862744 |
| C | 1.71186116504312  | -2.44207962732521 | -1.74226461371170 |
| C | 3.68169114336561  | -2.86461859107913 | -0.20755047390468 |
| H | 4.55098425446821  | -1.31338101996595 | 1.87793513802151  |
| H | 4.56089906571405  | -1.88715940958125 | 4.27434621993304  |
| H | 3.69189280943149  | -4.07103755191549 | 5.04245009473341  |
| H | 2.81203219777663  | -5.69951384879129 | 3.36784417193226  |
| H | 0.19991852776361  | -5.87550940322005 | -0.81904109341814 |
| H | -0.98730567217887 | -4.37947937214103 | -2.42701089157280 |
| H | -0.00380676961872 | -2.18311676406103 | -2.99625680943795 |
| H | 2.12554521853927  | -1.46885496220092 | -1.98338429175334 |
| H | 3.86360588490268  | -1.80074109758770 | -0.36381652249941 |
| H | 4.49913134644287  | -3.41071760596088 | -0.69591009505804 |
| O | 3.88298216127496  | -6.02753944918450 | -0.19525225287997 |
| O | 1.82127488106420  | -6.53164025991587 | 1.09991422412977  |
| S | 2.71328888249613  | -5.57317979481080 | 0.50987952026648  |

DFT Computations Orca 5.0.3, PBE0 D4 def2-TZVP – S<sub>1</sub> of 1 – 4.

X = O

Energy: -576.024706556601 Eh

Lowest IR freq: 59.55 cm<sup>-1</sup>

Cartesian coordinates:

|   |                  |                  |                   |
|---|------------------|------------------|-------------------|
| O | 3.37017834268050 | 5.22175736343241 | 1.13372185116080  |
| C | 3.02258434649571 | 4.04623956085272 | 0.57448662394895  |
| C | 3.45254375673798 | 2.91006340298608 | 1.27040264572037  |
| H | 4.01860262480036 | 3.03411923602832 | 2.18322173118716  |
| C | 3.12432288202021 | 1.66172369896618 | 0.74492247957013  |
| H | 3.43783208647130 | 0.75888230631501 | 1.25338059050006  |
| C | 2.39104745482899 | 1.57509011062205 | -0.43795475545301 |
| H | 2.14290932651011 | 0.59737594966733 | -0.83535919060251 |
| C | 1.97049721680163 | 2.71575795472005 | -1.11980498648823 |
| H | 1.40142842919668 | 2.63548759211741 | -2.03769114709237 |
| C | 2.28582295906801 | 3.99070395688294 | -0.61376067973746 |
| C | 1.85874166996442 | 5.22175947837038 | -1.30422916871619 |
| H | 0.75577129775090 | 5.22175955983454 | -1.43876221255701 |
| H | 2.23049161581033 | 5.22176048053872 | -2.35140742301736 |
| C | 3.02258540016087 | 6.39727590703842 | 0.57448881983697  |
| C | 3.45254621438483 | 7.53345072427187 | 1.27040690371568  |
| H | 4.01860525661202 | 7.40939310580664 | 2.18322560157010  |
| C | 3.12432682454940 | 8.78179164468376 | 0.74492758065174  |
| H | 3.43783700207019 | 9.68463237375698 | 1.25338619934480  |
| C | 2.39105219169842 | 8.86842689792141 | -0.43795016210508 |
| H | 2.14291421585674 | 9.84614183213420 | -0.83535288701794 |
| C | 1.97050072265767 | 7.72776059755036 | -1.11980260716377 |
| H | 1.40143363920161 | 7.80803295350829 | -2.03768962083806 |
| C | 2.28582452367109 | 6.45281331199389 | -0.61375918641778 |

X = S

Energy: -898.936764454031 Eh

Lowest IR freq: 33.53 cm<sup>-1</sup>

Cartesian coordinates:

|   |                   |                   |                   |
|---|-------------------|-------------------|-------------------|
| C | 0.77221717426526  | 0.08016890278275  | 0.83801485886852  |
| C | 5.50253433816719  | -2.14189628194712 | -0.04772092887474 |
| C | 5.62146069751320  | -1.60369087427904 | 1.26269986255904  |
| C | 4.56388220473236  | -0.94605896694935 | 1.82153333829952  |
| C | 3.35364218684907  | -0.79767378104402 | 1.10594814153370  |
| C | -0.38737787441931 | 0.73812289861893  | 1.30838648575058  |
| C | -1.50284400974712 | 0.81763598771578  | 0.52567684189466  |
| C | -1.49543423182916 | 0.23451992770435  | -0.77093075618226 |
| C | -0.36493626637656 | -0.40744738196246 | -1.23025454319396 |
| C | 0.79521793354315  | -0.51397474760447 | -0.46793918589170 |
| C | 1.97733600869452  | -1.21471026972702 | -1.01171793718396 |
| C | 3.21760106451634  | -1.33632097147374 | -0.21707567243268 |
| C | 4.32246083064145  | -1.99790673068189 | -0.74611193491933 |
| H | 6.33770408862310  | -2.66430723855960 | -0.49707835832168 |
| H | 6.54509596405446  | -1.71369083716136 | 1.81678088403697  |
| H | 4.64013016804645  | -0.52961038648386 | 2.82067850327804  |
| H | -0.37776716921775 | 1.17864281535537  | 2.30003488882563  |
| H | -2.38750936226088 | 1.32265820674202  | 0.89243007926959  |
| H | -2.37662277191996 | 0.29424192409129  | -1.39721527103660 |
| H | -0.36876820137338 | -0.85052920547307 | -2.22226662796611 |
| H | 2.23730959852867  | -0.74244482730426 | -1.97320662642704 |
| H | 1.66358584556204  | -2.22948597665146 | -1.30583706831350 |
| H | 4.24031678835030  | -2.41299215448002 | -1.74679029822885 |
| S | 2.10366499505647  | 0.04254996877228  | 1.89376132465614  |

X = SO

Energy: -973.954321575307 Eh

Lowest IR freq: 58.51 cm<sup>-1</sup>

Cartesian coordinates:

|   |                  |                   |                   |
|---|------------------|-------------------|-------------------|
| S | 5.49701753991482 | 0.88558234633624  | 13.40535852135563 |
| O | 5.00719859693024 | -0.44224382274316 | 12.94697028563788 |
| C | 5.02041298951647 | 1.40561443856016  | 14.95658363270600 |
| C | 5.82196520288916 | 1.16671724576281  | 16.08743662670689 |
| H | 6.76229561303805 | 0.63886287830528  | 15.98792170483613 |
| C | 5.39160847137453 | 1.61636741291028  | 17.31514491859652 |
| H | 6.00530045058242 | 1.44003333590783  | 18.19051239403603 |
| C | 4.17445306071476 | 2.28721159027881  | 17.43832205645025 |
| H | 3.83678192104261 | 2.62881529307415  | 18.40837131875283 |
| C | 3.38888808791971 | 2.51552815724034  | 16.30785781935402 |
| H | 2.44880011393544 | 3.04928293761918  | 16.40245152026829 |
| C | 3.77585370623457 | 2.07988285674285  | 15.06010138571351 |
| C | 2.97594611045760 | 2.30007193618134  | 13.81443460254248 |
| H | 2.56875623149806 | 1.33010932578488  | 13.47899425064106 |
| H | 2.12695614599009 | 2.95459320357378  | 14.01216951708771 |
| C | 3.83595210311319 | 2.86197110310492  | 12.72571060728556 |
| C | 3.50001969844289 | 3.96592776192822  | 11.97412876764028 |
| H | 2.55672232663740 | 4.46315612741751  | 12.17563017285774 |
| C | 4.34058151692371 | 4.45147670234079  | 10.97163686043694 |
| H | 4.04230397809479 | 5.31225878168228  | 10.38698953574410 |
| C | 5.56146271332369 | 3.82337033097513  | 10.72321388706138 |
| H | 6.21746145281261 | 4.19936202598657  | 9.94714074774278  |
| C | 5.94196640980335 | 2.71968336448827  | 11.45237403056188 |
| H | 6.88489904472674 | 2.22384014982261  | 11.25800744464835 |
| C | 5.08529651408303 | 2.24262451671889  | 12.46083739133565 |

## SUPPORTING INFORMATION

X = SO<sub>2</sub>

Energy: -1049.127888789644 Eh

Lowest IR freq: 55.61 cm<sup>-1</sup>

Cartesian coordinates:

|   |                   |                   |                   |
|---|-------------------|-------------------|-------------------|
| C | 3.84678165995569  | -2.22094585627194 | 1.85788659861757  |
| C | 3.83479384171946  | -3.31941706580473 | 0.98991499846469  |
| C | 3.40398493211146  | -4.60874112319971 | 1.50990594118484  |
| C | 2.08084944185730  | -4.69341367437047 | -0.60042937874665 |
| C | 2.69025325789271  | -3.39325344605357 | -0.83724854615406 |
| C | 3.56898219215493  | -2.37997780618251 | 3.19438947860857  |
| C | 3.18967279501715  | -3.65207892343712 | 3.69379645442091  |
| C | 3.09620279760552  | -4.74548427940324 | 2.86356740249948  |
| C | 0.73532225152227  | -4.89819664096984 | -0.90481879796377 |
| C | -0.00903269797868 | -3.86009534866219 | -1.41643644943260 |
| C | 0.55979141428121  | -2.57619538084860 | -1.61535104015752 |
| C | 1.87588568349318  | -2.34894702047041 | -1.29171303442631 |
| C | 4.12149694790536  | -3.19888287237921 | -0.46812038790857 |
| H | 4.13132294827691  | -1.25038018536932 | 1.46674399173344  |
| H | 3.64276096418414  | -1.53724631923495 | 3.86974472206939  |
| H | 2.95110187456089  | -3.75795358986203 | 4.74564261678532  |
| H | 2.76046260745093  | -5.70712950164226 | 3.23074712302426  |
| H | 0.29418351440312  | -5.86664845981778 | -0.70564724477273 |
| H | -1.05422095225475 | -4.01903055402229 | -1.65454111542644 |
| H | -0.04522645396042 | -1.77835115632286 | -2.02655503605218 |
| H | 2.31661484849961  | -1.36861719098721 | -1.43545696701075 |
| H | 4.48049710097311  | -2.20637939541932 | -0.73319990708050 |
| H | 4.77904518375677  | -3.98246550858412 | -0.84816923706093 |
| O | 4.20118491574096  | -6.18440106871441 | -0.40127592048271 |
| O | 2.17988967306401  | -6.82942127886359 | 0.89324640765706  |
| S | 3.01569925776712  | -5.80304635310622 | 0.32917732761018  |

DFT Computations Orca 5.0.3, UHF def2-SVP – T<sub>1</sub> of 1 – 4.

X = O

Energy: -572.933311490208 Eh

Lowest IR freq: 49.39cm<sup>-1</sup>

Cartesian coordinates:

|   |                  |                  |                   |
|---|------------------|------------------|-------------------|
| O | 3.48322478657204 | 5.22310669580206 | 1.03889964076132  |
| C | 3.08068672784722 | 4.03289047637432 | 0.53148005776116  |
| C | 3.45834140680124 | 2.88870684359439 | 1.24238859734677  |
| H | 4.04377311222539 | 3.00768325997182 | 2.14321454614147  |
| C | 3.07322539438520 | 1.63320727483257 | 0.78204763260012  |
| H | 3.36262681586478 | 0.74722243202173 | 1.33139535394530  |
| C | 2.31066028807691 | 1.52225879018237 | -0.38588919477260 |
| H | 2.00679979210277 | 0.54926702029436 | -0.74818458243005 |
| C | 1.94300131053089 | 2.67289120966680 | -1.08214832954446 |
| H | 1.35191108768518 | 2.58715034171270 | -1.98577794086380 |
| C | 2.32251876241687 | 3.94931007843658 | -0.63933661254453 |
| C | 1.94063987948738 | 5.19601956753682 | -1.40631890589117 |
| H | 0.86707327860456 | 5.18923109366991 | -1.60799215474499 |
| H | 2.43495069849273 | 5.19001539953655 | -2.38225700785597 |
| C | 3.07038723307127 | 6.37667583972767 | 0.48580818555190  |
| C | 3.50028225588986 | 7.59692053639507 | 1.26044228559312  |
| H | 4.10498694535242 | 7.45296914389372 | 2.14257399514206  |
| C | 3.09356752274039 | 8.84925794027843 | 0.80397626747566  |
| H | 3.38484429468446 | 9.73725771664197 | 1.35062168485659  |
| C | 2.32334140198655 | 8.96900287286721 | -0.34304728955584 |
| H | 2.00568289023045 | 9.93728299619672 | -0.70316841451339 |
| C | 1.91466166527680 | 7.72485924071402 | -1.11784644963073 |
| H | 1.32071313273798 | 7.83117741462338 | -2.01445183792367 |
| C | 2.31249931693661 | 6.45783581502868 | -0.66102952690426 |

X = S

Energy: -895.506286049398 Eh

Lowest IR freq: 36.24 cm<sup>-1</sup>

Cartesian coordinates:

|   |                   |                   |                   |
|---|-------------------|-------------------|-------------------|
| C | 0.99643582969118  | 0.72882421362837  | 0.48576009882343  |
| C | 5.35333897898474  | -2.34595889575582 | -0.00694966988156 |
| C | 5.33240620321686  | -2.02515665238811 | 1.35379166783631  |
| C | 4.30248741719046  | -1.23676745209159 | 1.86193509380707  |
| C | 3.28192781257853  | -0.75831327616667 | 1.02006996995197  |
| C | -0.30479757172435 | 1.32379160983792  | 0.93490573590093  |
| C | -1.47153115527677 | 0.67306233785476  | 0.63152511479797  |
| C | -1.47452675982484 | -0.46253422692910 | -0.23313288307021 |
| C | -0.27655712439993 | -0.87668145435735 | -0.88903291694767 |
| C | 0.92402322981085  | -0.26253126660476 | -0.63796090549963 |
| C | 2.21641397296760  | -0.59512121764227 | -1.31431328686240 |
| C | 3.28717707252118  | -1.08328908133731 | -0.35202378559723 |
| C | 4.33852689502531  | -1.87586760409540 | -0.84095813101850 |
| H | 6.14687989380616  | -2.95937173933335 | -0.41241802032076 |
| H | 6.10962022488938  | -2.38592503528105 | 2.01430242236727  |
| H | 4.28446891631813  | -0.98537489956661 | 2.91436802228603  |
| H | -0.29831031227347 | 2.24140300110677  | 1.50879555633068  |
| H | -2.41488471169892 | 1.05708251337907  | 0.99986425216687  |
| H | -2.40643823077028 | -0.96373756480744 | -0.45638206012814 |
| H | -0.33218824731760 | -1.66025679202844 | -1.63562031929050 |
| H | 2.58989635524063  | 0.30312775387656  | -1.82165956122522 |
| H | 2.05543268916434  | -1.34901068253735 | -2.08498592079555 |
| H | 4.35139523360403  | -2.13304945418870 | -1.89302118410241 |
| S | 2.04170338827672  | 0.23745586542788  | 1.80494071047122  |

DFT Computations Orca 5.0.3, UHF def2-SVP – T<sub>1</sub>

X = SO

Energy: -970.482066348404 Eh

Lowest IR freq: 25.90 cm<sup>-1</sup>

Cartesian coordinates:

|   |                  |                   |                   |
|---|------------------|-------------------|-------------------|
| S | 4.13848954349066 | 0.12864850916401  | 11.06304500284040 |
| O | 4.38593751855745 | -0.07083823238365 | 9.60822500621710  |
| C | 5.36017705516242 | 1.60419017865185  | 15.93898901157399 |
| C | 5.65563963586887 | 1.99260281279456  | 17.23843752961738 |
| H | 6.62397554303363 | 1.80002546693687  | 17.68144083854082 |
| C | 4.64173663437809 | 2.64546610384546  | 17.95849780594622 |
| H | 4.81960842582316 | 2.96784969559069  | 18.97618524091199 |
| C | 3.39704862484351 | 2.87454645735428  | 17.35471333283562 |
| H | 2.61458802392410 | 3.37331212448849  | 17.91110341243117 |
| C | 3.15004847833897 | 2.46211403757731  | 16.03600981601099 |
| H | 2.18026530011807 | 2.64926543662005  | 15.59131547890057 |
| C | 4.14446314710593 | 1.80641589973001  | 15.28627208026519 |
| C | 3.91336688637652 | 1.34422322002913  | 13.86475501359894 |
| H | 4.36596224241951 | 0.35815707166069  | 13.75384333729885 |
| H | 2.84067120471589 | 1.20327766820793  | 13.70853401659456 |
| C | 4.44856516128837 | 2.26389860782420  | 12.77341491591179 |
| C | 4.79926625359669 | 3.59641451114543  | 13.02507291640150 |
| H | 4.72035190549974 | 3.98438393346999  | 14.02991753305538 |
| C | 5.25567290549568 | 4.43821185617333  | 12.00269748302321 |
| H | 5.51796705726868 | 5.46275655240808  | 12.23128067697973 |
| C | 5.36888901657279 | 3.95771787146022  | 10.69431067215910 |
| H | 5.71811779132470 | 4.60521468786796  | 9.90136839860114  |
| C | 5.02812656557333 | 2.63559707445065  | 10.41062779927919 |
| H | 5.10913955618553 | 2.24272448651232  | 9.40814694343443  |
| C | 4.57082552303720 | 1.79392396841989  | 11.44009573756921 |

## SUPPORTING INFORMATION

X = SO<sub>2</sub>

Energy: -1045.06208630477 Eh

Lowest IR freq: 55.09 cm<sup>-1</sup>

Cartesian coordinates:

|   |                   |                   |                   |
|---|-------------------|-------------------|-------------------|
| C | 4.28388720597091  | -2.25775313596628 | 2.18692198826777  |
| C | 3.78487189187384  | -3.13400709631887 | 1.22537098840942  |
| C | 3.20735806785251  | -4.45867968503400 | 1.71573040585510  |
| C | 1.86083269837176  | -4.53801538282544 | -0.58248834469544 |
| C | 2.41309473711625  | -3.27273581526271 | -0.86996691637883 |
| C | 4.22105736785192  | -2.55262445157975 | 3.54323139452091  |
| C | 3.55292083781286  | -3.83428773336701 | 4.00534152858596  |
| C | 3.07941119334398  | -4.74312127319914 | 3.07213937095995  |
| C | 0.62666198498614  | -4.94610683851635 | -1.08992348013154 |
| C | -0.07704403145274 | -4.08413588233389 | -1.93452789930131 |
| C | 0.45533485988670  | -2.83020812596999 | -2.24485717961492 |
| C | 1.68444392829473  | -2.42650667785003 | -1.71148527414650 |
| C | 3.74163321156105  | -2.86219171028641 | -0.25821106629089 |
| H | 4.72228976725250  | -1.32030510840473 | 1.86711967015416  |
| H | 4.62797646509678  | -1.87843649481092 | 4.28238260491806  |
| H | 3.45523454974549  | -4.02523095416485 | 5.06447970925991  |
| H | 2.61993147225011  | -5.67257152083102 | 3.37917529622780  |
| H | 0.23172058177572  | -5.91451424253250 | -0.81846069679744 |
| H | -1.03294436527446 | -4.38619290282060 | -2.34048369769587 |
| H | -0.08872840964438 | -2.15846595524540 | -2.89564860587785 |
| H | 2.07549151737177  | -1.44588771683672 | -1.94991208465585 |
| H | 3.92365019539597  | -1.80582034826846 | -0.44547647088444 |
| H | 4.54019443192503  | -3.42500187747955 | -0.75269938462058 |
| O | 4.00323192734929  | -5.97292834577465 | -0.21153714152519 |
| O | 1.94272748110450  | -6.63265976026718 | 1.00032043045813  |
| S | 2.79306043218170  | -5.60831096405347 | 0.46926485499949  |

## References.

- 1 T. Stopka, L. Marzo, M. Zurro, S. Janich, E.-U. Würthwein, C. G. Daniliuc, J. Alemán and O. G. Mancheño, *Angew. Chem. Int. Ed.*, 2015, **54**, 5049–5053.
- 2 K. Okuma, A. Nojima, N. Matsunaga and K. Shioji, *Org. Lett.*, 2009, **11**, 169–171.
- 3 M. Matsui, Y. Miyamoto, K. Shibata and Y. Takase, *Bull. Chem. Soc. Jpn.*, 1984, **57**, 603–604.
- 4 X.-Q. Zhu, Z. Dai, A. Yu, S. Wu and J.-P. Cheng, *J. Phys. Chem. B*, 2008, **112**, 11694–11707.
- 5 M. Bhanuchandra, H. Yorimitsu and A. Osuka, *Org. Lett.*, 2016, **18**, 384–387.
- 6 J. C. Dyer and S. A. Evans, *J. Org. Chem.*, 1980, **45**, 5350–5355.
- 7 D. T. Hogan, Z. Dubrawski, B. S. Gelfand and T. C. Sutherland, *Eur. J. Org. Chem.*, 2022, **2022**, e202100913.
- 8 H. Kloosterziel and H. J. Backer, *Recl. Trav. Chim. Pays-Bas*, 1952, **71**, 361–372.
